1     **Determinants of Spike Infectivity, Processing and Neutralization**  
2             **in SARS-CoV-2 Omicron subvariants BA.1 and BA.2**

3             Chiara Pastorio<sup>1#</sup>, Fabian Zech<sup>1#</sup>, Sabrina Noettger<sup>1</sup>, Christoph Jung<sup>2</sup>, Timo Jacob<sup>2</sup>,  
4                     Konstantin M.J. Sparrer<sup>1</sup> and Frank Kirchhoff<sup>1\*</sup>

5  
6     <sup>1</sup> Institute for Molecular Virology  
7     Ulm University Medical Centre  
8     89081 Ulm, Germany

9  
10    <sup>2</sup> Institute of Electrochemistry  
11    Ulm University  
12    89081 Ulm, Germany

13  
14    # both contributed equally and are in alphabetical order

15    \* Correspondence: [Frank.Kirchhoff@uni-ulm.de](mailto:Frank.Kirchhoff@uni-ulm.de)

16  
17    Running title: Functional impact of the Omicron Spike mutations

18  
19    KEYWORDS: SARS-CoV-2, Omicron, Spike protein, COVID-19, neutralization, BA.1, BA.2,  
20    variant evolution

21

22 **ABSTRACT**

23 The SARS-CoV-2 Omicron variant rapidly outcompeted other variants and currently dominates  
24 the COVID-19 pandemic. Its enhanced transmission, immune evasion and pathogenicity is  
25 thought to be driven by numerous mutations in the Omicron Spike protein. Here, we examined  
26 the impact of amino acid changes that are characteristic for the BA.1 and/or BA.2 Omicron  
27 lineages on Spike function, processing and susceptibility to neutralization. Individual mutations  
28 of S371F/L, S375F and T376A in the ACE2 receptor-binding domain as well as Q954H and  
29 N969K in the hinge region 1 impaired infectivity, while changes of G339D, D614G, N764K and  
30 L981F moderately enhanced it. Most mutations in the N-terminal region and the receptor binding  
31 domain reduced sensitivity of the Spike protein to neutralization by sera from individuals  
32 vaccinated with the BNT162b2 vaccine or therapeutic antibodies. Our results represent a  
33 systematic functional analysis of Omicron Spike adaptations that allowed this SARS-CoV-2  
34 variant to overtake the current pandemic.

35

36 **HIGHLIGHTS**

- 37 • S371F/L, S373P and S375F impair Spike function and revert in some BA.1 isolates  
38 • Changes of Q954H and N969K in HR1 reduce while L981F enhances S-mediated infection  
39 • Omicron-specific mutations in the NTD and RBD of Spike reduce neutralization  
40 • N440K, G446S, E484A and Q493K confer resistance to bamlanivimab or imdevimab

## 41 INTRODUCTION

42 SARS-CoV-2, the causative agent of the Coronavirus disease 2019 (COVID-19) pandemic, has  
43 infected more than 500 million people around the globe and caused almost 6.2 million fatalities  
44 (<https://coronavirus.jhu.edu/map.html>; April 13<sup>th</sup>, 2022). Effective vaccination is the best way to  
45 get this devastating pandemic under control. A variety of safe and effective vaccines against  
46 SARS-CoV-2 are available and more than 10 billion vaccine doses have been administered to  
47 date. However, low access to, or acceptance of vaccines together with the emergence of new  
48 SARS-CoV-2 variants jeopardise this strategy. So called variants of concern (VOCs) pose a  
49 particular risk. Their increased transmissibility, efficient immune evasion and altered  
50 pathogenicity are mainly determined by the viral spike (S) protein (Harvey et al., 2021; Jung et  
51 al., 2022; Tao et al., 2021).

52 Currently, the fifth SARS-CoV-2 VOC, termed Omicron, dominates the COVID-19  
53 pandemic. The Omicron VOC was first detected in Botswana and South Africa in November  
54 2021 and outcompeted the Delta VOC in an amazingly short time. Evolutionary studies revealed  
55 that the Omicron VOC evolved independently, possibly in a chronically infected  
56 immunocompromised individual, human population under poor surveillance or an unknown non-  
57 human species from which it spilled back to humans (Karim et al., 2021; Wei et al., 2021).  
58 Omicron contains a strikingly high number of mutations (Jung et al., 2022), especially in its S  
59 protein, compared to other variants and the initial Wuhan strains. Recent studies support that this  
60 VOC is highly transmissible and shows an increased ability to infect convalescent and vaccinated  
61 individuals (Altarawneh et al., 2022; Espenhain et al., 2021; Grabowski et al., 2022; Pulliam et  
62 al., 2022). This agrees with the finding that the Omicron VOC shows reduced susceptibility to  
63 neutralizing antibodies induced by previous SARS-CoV-2 infection or vaccination (Andrews et  
64 al., 2021; Cele et al., 2021; Hoffmann et al., 2021; Lu et al., 2021; Planas et al., 2021; Wilhelm  
65 et al., 2021). Notably, accumulating evidence suggests that Omicron infections are associated

66 with milder symptoms and decreased hospitalization and fatality rates compared to infections  
67 with the Delta SARS-CoV-2 VOC (Moore and Baden, 2022; Wolter et al., 2022).

68 The SARS-CoV-2 S protein is the major membrane glycoprotein required for recognising the  
69 viral receptor angiotensin-converting enzyme 2 (ACE2) and subsequent entry into target cells  
70 (Hoffmann et al., 2020; Letko et al., 2020). Thus, the S protein critically determines the cell  
71 tropism and transmissibility of SARS-CoV-2 in human populations. To mediate attachment and  
72 fusion, the S precursor needs to be proteolytically processed by cellular proteases after synthesis.  
73 The proprotein convertase furin cleaves S at the S1/S2 site to generate the S1 subunit, which is  
74 responsible for receptor binding, while the transmembrane serine protease 2 (TMPRSS2) or  
75 cathepsins B and L cleave at the S2' site just upstream of the hydrophobic fusion peptide to  
76 release the S2 subunit mediating membrane fusion (Walls et al., 2020; Wrapp et al., 2020). In its  
77 active form the S protein of SARS-CoV-2 forms trimers on the surface of the viral particles.  
78 Consequently, the S protein is also the major target of protective humoral immune responses  
79 (Walls et al., 2020) and all COVID-19 vaccines are based on the SARS-CoV-2 S antigen. Thus,  
80 mutations in the N-terminal or receptor binding domains (NTD and RBD, respectively) of S can  
81 confer increased resistance to neutralizing antibodies (Dai and Gao, 2021). It is clear that  
82 alterations in the viral surface glycoprotein Spike (S) of the Omicron VOC play a key role in its  
83 high transmissibility, efficient immune evasion and reduced pathogenicity. However, the impact  
84 of most amino acid changes distinguishing the Omicron S protein from that of the original  
85 Wuhan SARS-CoV-2 strain on viral infectivity and susceptibility to neutralization remains to be  
86 determined.

87 Here, we analyzed the functional impact of individual amino acid changes that distinguish the  
88 dominant 21K (BA.1) Omicron VOC and the emerging 21L (BA.2) variant from the early 2020  
89 Wuhan SARS-CoV-2 isolate. To achieve this, we introduced a total of 48 mutations in the S  
90 protein of the Wuhan strain and determined their impact on viral infectivity, expression and

91 proteolytic processing, as well as susceptibility to neutralizing antibodies and sera from  
92 vaccinated individuals. We show that several amino acid changes found in the Omicron S protein  
93 impair infectivity and demonstrate that numerous alterations in the NTD and RBD of BA.1 and  
94 or BA.2 S proteins affect neutralization by sera from BNT/BNT vaccinated individuals and  
95 therapeutic antibodies.

## 96 **RESULTS**

### 97 **Generation of S Proteins containing mutations found in Omicron**

98 Omicron is currently classified into two major lineages, BA.1 (21K) and BA.2 (21L) (Figure 1A)  
99 (Hadfield et al., 2018; Sagulenko et al., 2018). BA.1 has replaced the Delta VOC and dominated  
100 the COVID-19 pandemic at the beginning of 2022 (Figure 1B). However, the frequency of the  
101 BA.2 lineage is increasing (Figure 1B) and this variant has outcompeted BA.1 in many countries,  
102 such as India, Denmark, Austria and South Africa (Viana et al., 2022). Although only ~13% of  
103 the SARS-CoV-2 genome encodes for the S protein, this region contains most mutations  
104 distinguishing the Omicron VOCs from the original Wuhan Hu-1 SARS-CoV-2 strain. Many of  
105 the mutations that distinguish the Omicron S proteins from those of other SARS-CoV-2 variants  
106 are located in the RBD that interacts with the viral ACE2 receptor and is a major target of  
107 neutralizing antibodies (Figure 1C). The Omicron BA.1 and BA.2 S proteins share about 20  
108 amino acid changes in S compared to the 2020 Wuhan Hu-1 strain and 12 of these are located in  
109 the RBD (Figures 1C, 1D). In the consensus, a total of 14 mutations are specific for BA.1 and 9  
110 for BA.2 (Figures 1C, 1D). Thirteen of the 23 S consensus lineage-specific variations are located  
111 in the NTD (Figure 1D). All 43 non-synonymous defining mutations, insertions and deletions  
112 found in BA.1 and BA.2 Omicron VOCs (<https://covariants.org/variants/21L>) were introduced  
113 individually in the S protein of the original Wuhan Hu-1 strain by site-directed mutagenesis.  
114 Sequence analysis of the full-length S genes verified that all constructs contained the desired  
115 mutations (Figure 1D) and confirmed the absence of additional changes.

## 116 **Impact of mutations in Omicron Spike on viral pseudoparticle infection**

117 To analyse the functional impact of mutations found in the Omicron BA.1 and BA.2 variants,  
118 we generated vesicular stomatitis virus (VSV) particles pseudotyped with the parental and  
119 mutant SARS-CoV-2 S proteins. Previous studies established that these VSV pseudoparticles  
120 (VSVpp) mimic key features of SARS-CoV-2 entry, such as receptor usage, cell tropism,  
121 protease dependency and susceptibility to neutralizing antibodies (Hoffmann et al., 2020; Riepler  
122 et al., 2020; Schmidt et al., 2016). We found that the BA.1 S showed moderately reduced and  
123 the BA.2 S slightly enhanced infection efficiencies compared to the Wuhan Hu-1 S, while the S  
124 protein of the Delta VOC did not differ significantly from the original form (Figure 2A, left).  
125 Most of the 20 amino acid changes in S that are shared between the BA.1 and BA.2 variants did  
126 not significantly affect the efficiency of VSVpp infection (Figures 2A; S1). In agreement with  
127 previous findings (Korber et al., 2020; Yurkovetskiy et al., 2020), substitution of D614G slightly  
128 enhanced infection. Similarly, mutations of G339D, K417N and N764K had subtle enhancing  
129 effects. Notably, modest enhancing effects were not due to saturation of infection since only up  
130 to 10% of all target cells became GFP positive during the single round of infection (Figure S1).  
131 Substitution of S375F in the RBD drastically impaired and mutations of Q954H and N969K in  
132 HR1 reduced VSVpp infectivity (Figure 2A; S1).

133 Most of the BA.1 and BA.2 specific variations in the NTD of the S protein had minor effects  
134 on VSVpp infectivity (Figure 2A). Three changes ( $\Delta$ 69-70, T95I and L212I) in the NTD slightly  
135 enhanced and six alterations (T19I,  $\Delta$ 24-26, A67V,  $\Delta$ 142-144, Y145D, and  $\Delta$ 211) reduced  
136 VSVpp infection. Similar to the shared S375F, mutations of S371L or S371F in the BA.1 and  
137 BA.2 S proteins, respectively, strongly impaired viral infectivity. The adjacent BA.2-specific  
138 T376A change had similar disruptive effects (Figure 2A). Mutation of N856K that is specific for  
139 BA.1 and might stabilize the fusion peptide proximal region (Zhang et al., 2022) and T19I or

140  $\Delta$ 24-26 near the N-terminus of BA.2 S markedly reduced VSVpp infection (Figure 2A), although  
141 these residues do not affect known functional domains.

142 To assess infection kinetics and to challenge the above-mentioned infection results, we  
143 performed assays allowing automated quantification of the number of VSVpp infected (GFP+)  
144 Caco-2 cells over time. The various mutant S proteins mediated infection with similar kinetics  
145 but varying and frequently reduced efficiencies (Figure 2B). The results confirmed that the BA.1  
146 S shows moderately diminished infection efficiency compared to the Hu-1 Wuhan S protein.  
147 Individual mutations of T19I,  $\Delta$ 24-26, A67V, Y145D, S371L, S371F, S373P, S375F, T376A,  
148 G446S, Q493R, G496S, N679K, P681H, D796Y, N856K, Q954H and N969K all reduced the  
149 activity of the Hu-1 S to levels similar or below that obtained for the BA.1 S protein (Figure 2B).  
150 In contrast, shared mutations of N440K and D614G, as well as BA.1-specific changes of  $\Delta$ 69-  
151 70,  $\Delta$ 211, insertion of 214EPE, and mutation of L981F increased infection efficiencies. Our  
152 results agree with recent findings suggesting that the Q954H and N969K changes in heptad  
153 repeat 1 (HR1) reduce rather than enhance fusion efficiency (Suzuki et al., 2022; Xia et al., 2022;  
154 Zhao et al., 2021). In addition, our analysis revealed that N856K in BA.1 S and T19I as well as  
155  $\Delta$ 24-26 in the BA.2 NTD strongly impaired S-mediated infection. Perhaps most notably, all  
156 individual mutations in the three serine residues in a small loop region (S371L/F, S373P, S375F),  
157 as well as the adjacent BA.2-specific T376A change severely impaired S-mediated infection.

### 158 **Inefficient Processing and Virion Incorporation of Specific Spike Variants**

159 To examine S expression, proteolytic processing and virions incorporation of the mutants, we  
160 performed comprehensive western blot analyses of HEK293T cells co-transfected with VSV $\Delta$ G-  
161 eGFP and S expression constructs and the S-containing VSVpp in the culture supernatants. In  
162 agreement with the infectivity data, most individual amino acid changes, deletions or insertions  
163 had no significant impact on S expression and processing (Figure 3A). All 44 parental and mutant  
164 full-length S proteins were readily detected in the cellular extracts (Figure 3A). However,

165 mutations in S371L, S373P, S375F and T376A that impaired S infectivity (Figure 2) also reduced  
166 the efficiency of processing and/or incorporation into viral pseudoparticles (Figure 3A). The  
167 phenotypes of the S375F and T376A mutant were most striking and these S variants were hardly  
168 processed. Two BA.2 specific alterations in S (T19I and  $\Delta$ 24-26) that were less active in infection  
169 assays were associated with reduced levels of S protein on VSVpp (Figure 3A). Altogether, the  
170 levels of S2 protein expression and processing in cellular extracts relative to the parental Hu-1 S  
171 proteins correlated well with one another (Figure S2A) and with the efficiency of S-mediated  
172 infection (Figure 3B, left). Similar but less significant correlations were observed for the VSVpp  
173 infection and Spike levels in the culture supernatants (Figure 3B, right). T19I,  $\Delta$ 24-26, S375F  
174 and T376A reduced the levels of both S and S2 incorporated into VSVpp, while S371L/F mainly  
175 affected S2 levels in the particles. In comparison, mutations of Q493R, T547K, D796Y and  
176 N856K reduced VSVpp infection without exerting significant effects on S expression and  
177 processing in the cells although T547K and D796Y were associated with reduced levels of S2 in  
178 VSVpp (Figure 3). None of the mutations (H655Y, N679K and P681H) located near the S1/S2  
179 cleavage site had significant effects on S processing (Figure 3). In addition, confocal microscopy  
180 showed that mutant S proteins showing enhanced (D614G, L981F) or impaired (T19I, S371L/F,  
181 S373P, S375F, T376A) activity all localized at the cell surface (Figure S2B) indicating that  
182 disruptive effects were not due to impaired trafficking or mislocalization. Altogether, our results  
183 revealed that changes of T19I,  $\Delta$ 24-26, T376A, S375F and Q954H reduce VSVpp infectivity by  
184 affecting S processing although they are not located in proximity to the S1/S2 furin cleavage site.

### 185 **Functional relevance of serine mutations in an RBD loop region**

186 It came as surprise that all individual mutations of S371, S373 and S375 that are found in the  
187 Wuhan Hu-1 strains and the Alpha, Beta, Gamma and Delta VOCs to 371L/F, 373P and 375F  
188 present in Omicron severely impaired S function. Analysis of available SARS-CoV-2 sequences  
189 revealed that the BA.1 and BA.2 S proteins usually contain combined changes of SxSxS to



190 FxPxP or LxPxP, respectively (Figure 4A). However, we identified a small subcluster within the  
191 BA.1 sequence showing reversion to serine residues. Phylogenetic analysis suggests that these  
192 occurred sequentially: from FxPxP to FxSxP to FxSxS to SxSxS (Figure 4A). The serine  
193 containing loop is located adjacent to the RBD and might affect its up and down state (Sztain et  
194 al., 2021) and stabilize RBD-RBD interactions (Wrobel et al., 2022) (Figure 4B). Altogether, the  
195 results suggested that the combination of S371-S373-S375 or 371F/L373P375F might be  
196 required for effective S function and processing. To address this experimentally, we generated  
197 the LPF (BA.1) and FPF (BA.2) triple mutants of the Hu-1 S protein and analysed their ability  
198 to mediate VSVpp infection. Both showed dramatically lower fusion activity (Figure 4C). In  
199 comparison, combined changes of S477N/T478K in the RBD and N764K/N856K/Q954H in S2  
200 had only modest disruptive effects and alterations of N679K/P681H near the S2' processing site  
201 did not significantly change the infection efficiency of the Hu-1 S protein (Figure 4C).  
202 Intracellular localisation analyses showed that the LxPxP and FxPxP mutant S proteins were  
203 readily detectable at the cell surface, just like the parental Hu-1 S protein (Figure 4D). Thus, in  
204 agreement with the results on individual mutations (Figure S2B) the impaired activity and  
205 processing of the triple mutant S proteins is not due to altered trafficking or subcellular  
206 localization.

### 207 **Effect of Mutations in Omicron Spike on ACE2 interaction and Cell-to-Cell Fusion**

208 To examine the impact of specific mutations in the Omicron S protein on ACE2 interaction, we  
209 used a previously established *in vitro* S-ACE2 binding assay (Zech et al., 2021). Immobilized  
210 ACE2 is incubated with lysates of transfected HEK293T cells transfected with mutant S  
211 expression constructs. S protein retained after washing is detected by an  $\alpha$ V5-Ms and quantified  
212 using a secondary HRP-conjugated anti-mouse Ab. The S371F, S373P, D614G, N856K and  
213 L981F mutations in the Hu-1 S had little if any effect on S binding to human ACE2 (Figure 5A).  
214 In comparison, individual substitutions of S375F and T376A and the triple mutations (SSS to

215 LPF or FPF) reduced the levels of S protein bound to ACE2 (Figure 5A). In line with published  
216 data (Tian et al., 2011), mutation of N501Y enhanced binding of the SARS-CoV-2 S protein to  
217 human ACE2 (Figure 5A).

218 Cell-to-cell fusion assays showed that co-expression of human ACE2 and the parental Hu-1  
219 as well as the S373P, N501Y, D614G, N856K and L981F S proteins resulted in the formation of  
220 large syncytia (Figure 5B, 5C). In contrast, the S375F, T376A and triple LxPxP or FxPxP mutant  
221 S proteins did not lead to detectable fusion, while intermediate phenotypes were observed for the  
222 S371L and S371F Spikes (Figures 5B, 5C). In agreement with the VSVpp infection data, these  
223 results show that individual or combined mutations in S371, S373 and S375 or T376 disrupt the  
224 ability of the S protein to mediate membrane fusion.

225 Mutations of D614G and (to a stronger extent) L981F significantly increased syncytia  
226 formation (Figures 5B, 5C). L981 is located in the HR1 region of the S2 protein that interacts  
227 with HR2 to form a six-helix bundle to drive virus–host or cell-to-cell membrane fusion (Figure  
228 5D). In agreement with the functional data, molecular modelling of HR1/HR2 interactions using  
229 reactive force field simulations predicted that mutation of L981F significantly enhances  
230 interactions between HR1 and HR2 (Figure 5D). Taken together, syncytia formation is promoted  
231 by D614G found in all VOCs and the Omicron-specific mutation L981F, but almost abrogated  
232 by S375F, T376A and the triple SSS to LPF or FPF changes.

### 233 **Mutations in the Omicron S Affect Neutralization by Sera from Immunized Individuals**

234 Recent studies have shown that the Omicron BA.1 and BA.2 Spikes show reduced sensitivity to  
235 neutralizing Abs induced upon infection and vaccination (Andrews et al., 2021; Cele et al., 2021;  
236 Hoffmann et al., 2021; Lu et al., 2021; Zhang et al., 2021). To determine the contribution of  
237 individual amino acid changes to immune evasion by Omicron, we compared the sensitivity of  
238 the four parental Hu-1, Delta, BA.1, BA.2 with 43 mutant S proteins, each harboring one  
239 Omicron-specific mutation, to neutralization by sera from five individuals who received a prime

240 boost vaccination with the mRNA-based BioNTech-Pfizer (BNT162b2) vaccine (Table S1). This  
241 vaccine has been approved in 141 countries (<https://covid19.trackvaccines.org/vaccines/6/>), is  
242 frequently used in Europe and the US, and induces efficient protection against most COVID-19  
243 variants (Polack et al., 2020) but shows about 5- to 40-fold lower efficiency against Omicron  
244 (Cele et al., 2021; Collie et al., 2022; Iketani et al., 2022; Lu et al., 2021). Predictably, five  
245 randomly selected sera collected two weeks after the second dose of BNT neutralized BA.1 and  
246 BA.2 on average with substantially lower efficiency than the original Wuhan Hu-1 and Delta  
247 variants (Figure 6A; Table S1). A variety of shared as well as BA.1 or BA.2 specific amino acid  
248 changes reduced sensitivity to neutralization (examples shown in Figure 6A). It has been  
249 previously shown that the NTD contains important neutralizing epitopes (Chi et al., 2020) and  
250 that the mutations, deletions and insertions in this region are associated with significant structural  
251 changes (Zhang et al., 2022). Our analyses revealed that most individual mutations found in the  
252 NTD of BA.1 and BA.2 S proteins reduced neutralization sensitivity (Figure 6B). Deletion of  
253 residues 142-144 in BA.1 and G142D in BA.2 had the strongest effects (~9-fold reduction)  
254 followed by mutation of Y145D and 214EPE (both in BA.1) that conferred ~7-fold resistance.  
255 Amino acid changes in the RBD, such as G339D, S371L, S373P, K417N and N440K, as well as  
256 BA.2-specific alterations of S371F and R408S reduced sensitivity to neutralization by BNT/BNT  
257 sera, usually in the range of ~2- to 5-fold (Figure 6B). In comparison, five of the six mutations  
258 in the S2 region had little if any effect on neutralization. Only the N764K change reduced it on  
259 average about 2-fold. Altogether, 27 of the 43 mutations analyzed enhanced antibody-mediated  
260 neutralization resistance by >2-fold (Figure 6B). This further supports that a large number of  
261 substitutions in the Omicron Spike cooperates to allow efficient viral evasion of humoral immune  
262 responses.

263           In the final set of experiment, we examined the impact of specific mutations in the  
264   Omicron S protein on neutralization sensitivity to the FDA-approved therapeutic monoclonal  
265   antibodies REGN10987 (marketed as imdevimab), LY-CoV555 (marketed as bamlanivimab)  
266   and REGN10933 (marketed as casivirimab). The BA.1 VOC was not inhibited by imdevimab  
267   and the N440K or G446S mutations in the Hu-1 S were sufficient to confer full resistance (Figure  
268   7). In contrast, BA.2 S remained susceptible to imdevimab and changes of E484A, Q493R and  
269   G496S had little effect. In comparison, both BA.1 and BA.2 were fully resistant to bamlanivimab  
270   and substitutions of E484A or Q493R were sufficient to confer resistance (Figure 7). These  
271   results agree with those of two recent studies that also examined the impact of individual amino  
272   acid changes found in the BA.1 and BA.2 spikes on neutralization by a panel of monoclonal  
273   antibodies (Iketani et al., 2022; Liu et al., 2022). Finally, casivirimab showed no appreciable  
274   activity against BA.1 but neutralized BA.2 and all mutant S proteins analyzed, albeit with lower  
275   efficacy compared to the original Hu-1 S (Figure 7). Altogether, our results show that a strikingly  
276   high number of amino acid changes in the NTD and RBD regions of the Omicron S proteins  
277   contribute to evasion from neutralizing antibodies. The impact of individual mutations on  
278   susceptibility to neutralization varies strongly between sera obtained from individuals who  
279   received the BNT/BNT vaccine.  
280

## 281 **DISCUSSION**

282 The Omicron VOC has outcompeted the previously dominating Delta VOC in an amazingly  
283 short time. It is generally accepted that the high number of changes in Omicron S are the main  
284 reason for effective spread of this VOC and confer increased transmission efficiency and escape  
285 from neutralizing antibodies. Here, we systematically analyzed the functional impact of all  
286 individual amino acid changes, deletions and insertions that are characteristic for the Omicron  
287 BA.1 and BA.2 VOCs. In total, we examined 48 mutant Spike constructs containing amino acid  
288 changes distinguishing BA.1 and BA.2 Omicron VOCs from the original Hu-1 Wuhan strain.  
289 We identified several changes that strongly impair Spike-mediated infection and proteolytic  
290 processing. In addition, we demonstrate that BA.1 or BA.2 specific mutations in the NTD as well  
291 as shared alterations in the RBD significantly reduce the susceptibility of Spike containing  
292 VSVpp to neutralization by sera from BNT/BNT vaccinated individuals and therapeutic  
293 antibodies.

294 One striking finding was that individual mutations of S371F/L, S375F, T376A and (to a lesser  
295 extent) S373P in the receptor binding domain strongly impair Spike-containing pseudoparticle  
296 infectivity and Spike processing. S375F had the most drastic effect and almost fully disrupted  
297 Spike function and processing. This agrees with a recent preprint (Yamasoba et al., 2022) and is  
298 of particular interest because it has recently been reported that the S371L and S371F mutations  
299 in BA.1 and BA.2, respectively, have major effects on neutralization by different RBD classes  
300 (Liu et al., 2021; Iketani et al., 2022). However, our results show that although these mutations  
301 significantly reduce S-mediated infection (Figure 2) they have only modest effects on  
302 neutralization by BNT/BNT sera (Figure 6). Notably, all these residues are part of a loop that  
303 may affect the open and closed conformation of the RBD. Recent structural analyses show that  
304 mutations of S371L, S373P and S375F promote interprotomer interactions between the “down”  
305 RBDs (Gobeil et al., 2022). Specifically, it has been proposed that the S373P substitution induces

306 conformational changes of the loop resulting in closer packing of the RBD-RBD interface via  
307 interactions of S373P and S375F with the N501Y and Y505H substitutions in the adjacent RBD  
308 (Gobeil et al., 2022). Our functional analyses show that mutations of S371L/F and T376A  
309 severely affect Spike function, while changes of N501Y and Y505H had no disruptive effects on  
310 S-mediated infection. Both individual and combined mutations in the three serine residues (S371,  
311 S373 and S375) severely impaired the ability of the Hu-1 Spike protein to mediate virus-cell and  
312 cell-cell fusion. While further studies are necessary, it is tempting to speculate that, in the absence  
313 of additional alterations, changes of S371L, S373P, S375F and perhaps T376A might stabilize  
314 the inactive closed conformation of the Spike protein. The severe disruptive effects also raise  
315 questions whether they are associated with a selection advantage. Our identification of a  
316 subcluster of BA.1 isolates that sequentially reverts to the original sequence (FxPxP to FxSxF to  
317 FxSxS to SxSxS; Figure 4A) indicates that this may not be the case and it will be of significant  
318 interest to closely monitor the frequency of Omicron variants containing alterations in the serine  
319 containing loop region.

320 A variety of mutations in the S1 subunit ( $\Delta$ H69/V70, T95I,  $\Delta$ Y144, K417N, T478K, N501Y,  
321 D614G, H655Y and P681H) of BA.1 and/or BA.2 Omicron S proteins have previously been  
322 observed in other VOCs (Golcuk et al., 2021). As previously suggested (Mannar et al., 2022),  
323 we found that deletion of  $\Delta$ H69/V70 increased S-mediated infectivity (Figure 2). Our analyses  
324 also confirmed (Lam et al., 2021) that mutation of N501Y in the RBM of the Omicron Spike  
325 increases the binding affinity to ACE2 (Figure 5A). It has been proposed that mutations of  
326 H655Y, N679K and P681H may increase furin-mediated S1/S2 cleavage and enhance  
327 pseudoparticle infectivity (Aggarwal et al., 2021; Cameroni et al., 2021; VanBlargan et al.,  
328 2022). We found that none of these three changes significantly enhanced S-mediated VSVpp  
329 infection (Figure 2) and only H655Y clearly enhanced S processing (Figure 3). Mutations of  
330 K417N, Q493R, Q498R and N501Y are identical or similar to changes emerging during SARS-

331 CoV-2 adaptation to experimentally infected mice (Huang et al., 2021; Sun et al., 2021), and  
332 were proposed to stabilize the RBD and ACE2 interaction (Meng et al., 2022) or to contribute to  
333 the ability of Omicron to infect mouse cells (Hoffmann et al., 2021). However, individual  
334 changes had no significant effect on VSVpp infectivity or processing but reduced susceptibility  
335 to BNT/BNT neutralization. Similarly, based on cryo-EM analyses it has been suggested that  
336 alterations of Q493R, G496S and Q498R in the RBD of the Omicron S form may allow the  
337 formation of stronger interactions with ACE2 that compensate for a disruptive effect of K417N  
338 (Mannar et al., 2022) but none of these four mutations individually significantly affected S-  
339 mediated infection (Figure 2).

340 Predictably, many shared mutations in the RBD domain of BA.1 and BA.2 S proteins reduced  
341 the sensitivity of VSVpp to neutralization by sera from BNT/BNT vaccinated individuals (Figure  
342 6A). In addition, we also found that mutations of N440K or G446S conferred resistance to  
343 imdevimab and changes of E484A or Q493R to bamlanivimab, respectively. This was expected  
344 since these mutations are located within the epitopes bound by these antibodies (Figure 6B, 6C).  
345 Our results add to the evidence (Iketani et al., 2022; Liu et al., 2022) that single amino acid  
346 changes may confer full resistance to neutralizing antibodies. In comparison, mutation of E484A  
347 that has also been observed in other SARS-CoV-2 VOCs and was suggested to be associated  
348 with immune-escape (Rath et al., 2022) had only marginal effects on neutralization sensitivity.  
349 Unexpectedly, most lineage-specific changes in the NTD, such as A27S, T95I,  $\Delta$ 142-144,  
350 G142D, INS214EPE, L212I and V213G, were at least as effective in reducing S sensitivity to  
351 neutralization by sera from BNT/BNT vaccinated individuals as changes in the RBD (Figure  
352 6A). This supports a key role of the NTD as target for neutralizing antibodies in sera from  
353 vaccinated individuals.

354 Three mutations (Q954H, N969K and L981F) are located in the HR1 region of the S2 subunit  
355 of the S protein (Figure 1D). It has been initially proposed that these changes may promote 6-

356 helix bundle formation and subsequent fusion (Sarkar et al., 2021) but more recent evidence  
357 suggests that they may attenuate rather than enhance S-mediated fusion efficiency (Suzuki et al.,  
358 2022). In agreement with the latter, changes of Q954H and N969K clearly reduced S-mediated  
359 VSVpp infection (Figure 2). In contrast, substitution of L981F enhanced Spike-mediated VSVpp  
360 infection and (more strongly) cell-to-cell fusion (Figure 5B). Reactive force simulations suggest  
361 that the L981F mutation enhances interactions between the HR1 and HR2 regions that drive  
362 fusion. Notably, recent data showed that the three mutations in the HR1 region of the Omicron  
363 S do not alter the global architecture of the post-fusion six-helix bundle (Yang et al., 2022) and  
364 peptide-based pan-CoV fusion inhibitors derived from the HR region maintain high potency  
365 against the SARS-CoV-2 Omicron VOC (Xia et al., 2022).

366 The molecular mechanisms of several mutations in the Omicron S protein remain to be fully  
367 elucidated. For example, BA.2-specific changes of T19I and  $\Delta$ 24-26 in the NTD severely  
368 reduced S-mediated infection and processing although they do not affect known functional  
369 domains. It has been suggested that a shared mutation of N764K and a BA.2-specific substitution  
370 of N856K generate potential cleavage sites for SKI-1/S1P protease and might impede the  
371 exposition of the fusion peptide for membrane fusion (Maaroufi, 2022). We found that N764K  
372 is indeed associated with increased infectivity and increased levels of processed Spike in VSVpp.  
373 In comparison, N856K clearly reduced S-mediated infection despite normal processing.

#### 374 **Limitations of the study**

375 In the present study, we used pseudotyped viral particles instead of replication-competent  
376 recombinant SARS-CoV-2 variants, which serves as a proxy to assess infectivity, fusion activity  
377 and incorporation. In addition, the impact of many changes might be context-dependent and this  
378 might explain why some individual changes had disruptive effects on Hu-1 S function although  
379 they are found in Omicron S proteins. It is difficult to predict which of the numerous mutations  
380 in the Omicron S might compensate for disruptive mutations. For example, we found that the



381 BA.1 S was less effective in mediating infection than the BA.2 S protein (Figure 2). This agrees,  
382 with accumulating evidence that the BA.2 VOC might be more infectious and more virulent than  
383 the BA.1 VOC (Suzuki et al., 2022). In addition, we analysed only a limited number of sera from  
384 individuals who received a single vaccine regimen (BNT/BNT) and just a few therapeutic  
385 antibodies. While further studies are required to fully understand the full consequences of all the  
386 complex changes in the Omicron Spike on viral infectivity, tropism, transmission and  
387 pathogenesis our results provide first important insights into the functional impact of mutations  
388 characteristic for the Omicron VOC Spike that currently dominates the pandemic.

389

#### 390 **ACKNOWLEDGEMENTS**

391 We thank Kerstin Regensburger, Regina Burger, Jana-Romana Fischer, Birgit Ott, Martha  
392 Meyer, Nicola Schrott and Daniela Krnavek for technical assistance and Dorota Kmiec for  
393 critical reading of our manuscript. The ACE2 expression vector and SARS-CoV-2 S-HA plasmid  
394 were kindly provided by Shinji Makino and Stefan Pöhlmann. C.P. and S.N. are part of the  
395 International Graduate school for Molecular Medicine (IGradU). This study was supported by  
396 DFG grants to F.K. (CRC 1279, SPP 1923), K.M.J.S. (CRC 1279, SPP 1923, SP 1600/6-1) and  
397 T.J. (CRC 1279). F.K., and K.M.J.S. were supported by the BMBF (Restrict SARS-CoV-2 and  
398 IMMUNOMOD).

399

#### 400 **CONTRIBUTIONS**

401 C.P. and F.Z. performed most experiments with support by S.N. F.Z., K.M.J.S., and F.K.  
402 conceived the study and planned experiments. C.J. and T.J. performed molecular modelling and  
403 dynamics simulations. F.K. wrote the initial draft of the manuscript. All authors reviewed and  
404 approved the manuscript.

405

406 **DECLARATION OF INTERESTS**

407 All authors declare no competing interests

408

409 **MAIN FIGURE LEGENDS**

410 **Figure 1. Features of Omicron BA.1 and BA.2 VOCs.**

411 (A) Radial phylogenetic tree of representative SARS-CoV-2 strains (n= 2863 genomes, sampled  
412 between Dec 2019 and Mar 2022) scaled according to their divergence compared to the Wuhan  
413 Hu-1 sequence. Retrieved from Nextstrain on April 7<sup>th</sup> 2022  
414 (<https://nextstrain.org/ncov/gisaid/global?m=div>) and modified. Colour coding according to  
415 VOCs as indicated.

416 (B) Frequencies of SARS-CoV-2 Delta, BA.1 and BA.2 sequences in data from GenBank from  
417 September 1<sup>st</sup> 2021 to 7<sup>th</sup> of April 2022. Scaled to 100%. Retrieved and modified from Nextstrain  
418 on April 7<sup>th</sup> 2022. Orange, Delta VOC. Purple, BA.1. Green, BA.1.

419 (C) Overview on the SARS-CoV-2 spike structure (downloaded from PDB: 7KNB) and  
420 localization of amino acid changes that are shared between BA.1 and BA.2 or specific for BA.1  
421 or BA.2 as indicated. S1 (orange), S2 (blue) ACE2 (grey), mutations (red), BA.1 specific  
422 deletions (blue), BA.2 specific deletions (yellow).

423 (D) Schematic depiction of the SARS-CoV-2 spike, its domains and amino acid alterations in  
424 Omicron BA.1 (dark green) and BA.2 (light green) VOC compared to the Wuhan Hu-1 sequence.  
425 S1 subunit: N-terminal domain, NTD (purple) and receptor binding domain, RBD (orange).  
426 Receptor binding motif, RBM (dark orange). S2 subunit: fusion peptide, FP (blue), heptad repeat  
427 1, HR1 (dark blue) central helix, CH, connector domain, CD, heptad repeat 2, HR2, and  
428 transmembrane domain, TM (blue).

429

430 **Figure 2. Impact of mutations in Omicron on Spike-mediated infection.**

431 (A) Automatic quantification of infection events of CaCo-2 cells transduced with VSV $\Delta$ G-GFP  
432 pseudotyped with SARS-CoV-2 Hu-1 (grey), Delta (turquoise), BA.1 (dark green), BA.2 (light  
433 green) or indicated mutant S proteins. The localisation of each mutation in S is indicated by  
434 colour. S1: NTD (purple), RBD (orange), RBM (dark orange), others (light orange), S2: HR1  
435 (dark blue) others (light blue). Bars represent the mean of three independent experiments  
436 ( $\pm$ SEM). Statistical significance was tested by one-way ANOVA. \*P < 0.05; \*\*P < 0.01; \*\*\*P  
437 < 0.001.

438 (B) Infection kinetics of CaCo-2 cells infected by VSVpp containing the indicated mutant S  
439 proteins. Infected cells were automatically quantified over a period of 22 h.

440 See also Figure S1.

441

442 **Figure 3. Expression and processing of Spike proteins containing mutations present in the**  
443 **Omicron BA.1 and BA.2 VOCs.**

444 (A) The upper panels show exemplary immunoblots of whole cells lysates (WCLs) and VSVpp  
445 containing supernatants of HEK293T cells transfected with vectors expressing the Hu-1 or  
446 mutant SARS-CoV-2 S proteins and VSV $\Delta$ G-GFP constructs. Blots were stained with anti-V5  
447 (Spike), anti- $\beta$ -actin and anti-VSV-M protein. Lower panels: expression levels of uncleaved,  
448 full-length Spike protein (S, gray bars) and the S2 subunit (bars coloured according to the  
449 corresponding domains as shown in Figure 1D) were quantified. The results show mean values  
450 ( $\pm$ SEM) obtained from three independent experiments.

451 (B) Correlation of the S2 expression/incorporation and S/S2 processing of the parental S Hu-1  
452 or indicated mutant S proteins in cells and supernatants with the corresponding pseudotype  
453 infection rates. Coefficient of determination ( $R^2$ -values) and two tailed P values are provided.

454 See also Figure S2.

455 **Figure 4. Evolution and functional relevance of S371L/F, S373P and S375F changes in the**  
456 **Spike protein.**

457 **(A)** Phylogenetic tree of Delta, Omicron BA.1 and BA.2 strains. Amino acids at position 371,  
458 373 and 375 are indicated; all other SARS-CoV-2 variants almost invariably contain three  
459 serines at these positions. Colour coding as indicated according to VOC. Retrieved and modified  
460 from Nextstrain on April 7<sup>th</sup> 2022.

461 **(B)** Close-up view of the region encompassing the mutations S371L, S373P and S375F and the  
462 surrounding region. Downloaded from PDB: 7KNB, 7TGW or 7WKA as indicated.

463 **(C)** Automatic quantification of infection events of CaCo-2 cells transduced with VSV $\Delta$ G-GFP  
464 pseudotyped with SARS-CoV-2 Hu-1 or indicated combined mutations. Bars represent the mean  
465 of three independent experiments ( $\pm$ SEM). Statistical significance was tested by one-way  
466 ANOVA. \*P < 0.05; \*\*P < 0.01; \*\*\*P < 0.001.

467 **(D)** Immunofluorescence images of HEK293T cells expressing the parental S Hu-1, the BA.1  
468 specific S37xLPF or the BA.2 specific S37xFPF mutations. Scale bar, 10  $\mu$ m.

469

470 **Figure 5. ACE2 interaction of Spike variants**

471 **(A)** Binding of the indicated Hu-1 and mutant S proteins to ACE2 binding using whole cell  
472 lysates of transfected HEK293T. Bars represent the mean of three independent experiments  
473 ( $\pm$ SEM). Statistical significance was tested by one-way ANOVA. \*P < 0.05; \*\*P < 0.001.

474 **(B)** Representative fluorescence microscopy images of HEK293T cells expressing parental Hu-  
475 1 or indicated mutant S proteins, Human ACE2 and GFP (green). Scale bar, 125  $\mu$ m.

476 **(C)** Automatic quantification of syncytia formation of HEK293T cells expressing parental Hu-1  
477 or indicated mutant S proteins and Human ACE2. Bars represent the mean of three independent  
478 experiments ( $\pm$ SEM). Statistical significance was tested by two-tailed Student's t-test with  
479 Welch's correction. \*P < 0.05; \*\*P < 0.01; \*\*\*P < 0.001.

480 (D) Overview on the SARS-CoV-2 post-fusion spike structure (downloaded from PDB: 6M3W)  
481 and comparative ReaxFF simulation of the mutation L981F.

482

483 **Figure 6. Impact of mutations in the Omicron Spike on serum neutralization.**

484 (A) Neutralization of VSVpp carrying the indicated wildtype and mutant S proteins by sera  
485 obtained from five BNT/BNT vaccinated individuals compared to the untreated control (set to  
486 one). Shown are mean values obtained for the five sera, each tested in three independent  
487 experiments.

488 (B) Changes in TCID<sub>50</sub> values obtained for neutralization of the indicated mutant S proteins by  
489 sera from five vaccinated individuals relative to those obtained for the Hu-1 S. Solid red bars  
490 indicate average values ( $\pm$ SEM) for the five sera and open black squares the average infectivity  
491 of the respective S containing VSVpp shown in Figure 2A.

492 See also Figure Table S1.

493

494 **Figure 7. Impact of mutations in the Omicron Spike on neutralization by therapeutic Abs.**

495 Close-up view of neutralising antibodies binding the SARS-CoV-2 Spike (PDB: 6XDG or 7L3N  
496 as indicated) and automated quantification of GFP fluorescence of Caco-2 cells infected with  
497 VSV $\Delta$ G-GFP pseudotyped with the indicated S variants. VSVpp were pre-treated (30 min, 37  
498 °C) with the indicated amounts of Imdevimab, Bamlanivimab or Casivirimab. Lines represent  
499 the mean of three independent experiments.

500 **STAR METHODS**

501 **RESOURCE AVAILABILITY**

502 **Lead contact**

503 Further information and requests for resources and reagents should be directed to and will be  
504 fulfilled by the Lead Contact, Frank Kirchhoff ([frank.kirchhoff@uni-ulm.de](mailto:frank.kirchhoff@uni-ulm.de))

505 **Materials Availability**

506 All unique reagents generated in this study are listed in the Key Resources Table and available  
507 from the Lead Contact.

508 **Data and code availability**

509 This study did not generate or analyse datasets or codes.

510

511 **METHOD DETAILS**

512 **Cell Culture.** All cells were cultured at 37 °C and 5% CO<sub>2</sub> in a humidified atmosphere. HEK293T  
513 (human embryonic kidney) cells (ATCC: #CRL3216) were maintained in Dulbecco's Modified  
514 Eagle Medium supplemented with 10% (v/v) heat-inactivated fetal calf serum, 2 mM L-  
515 glutamine, 100 µg/ml streptomycin and 100 U/ml penicillin. Caco-2 (human epithelial colorectal  
516 adenocarcinoma) cells were cultivated in DMEM containing 10% FCS, 2mM glutamine, 100  
517 µg/ml streptomycin and 100 U/ml penicillin, 1mM NEAA supplement. Mouse I1-Hybridoma  
518 cells (ATCC: #CRL2700) were cultured in Roswell Park Memorial Institute (RPMI) 1640  
519 medium supplemented with 10% (v/v) heat-inactivated fetal calf serum, 2 mM L-glutamine, 100  
520 µg/ml streptomycin and 100 U/ml penicillin.

521 **Expression Constructs.** pCG\_SARS-CoV-2-Spike-IRES\_eGFP encoding the spike protein of  
522 SARS-CoV-2 isolate Wuhan-Hu-1(NCBI reference Sequence YP\_009724390.1), pCG\_SARS-  
523 CoV-2-S (1.617), pCG1\_SARS-2-S (B.1.1.529) and pCG1\_SARS-2-SΔ18 (BA.2) were kindly  
524 provided by Stefan Pöhlmann (DPZ Göppingen, Germany). pCG\_SARS-CoV-2-Spike C-V5-  
525 IRES\_eGFP was PCR amplified and subcloned into a pCG-IRES\_eGFP expression construct  
526 using the restriction enzymes XbaI+MluI. The SARS-CoV-2 S mutant plasmids were generated  
527 using Q5 Site-Directed Mutagenesis Kit (NEB #E0554). ACE2 was synthesized by Twist  
528 bioscience, PCR amplified, and subcloned into a pCG-IRES\_eGFP expression construct using  
529 the restriction enzymes XbaI+MluI. All constructs were verified by sequence analysis using a  
530 commercial sequencing service (Eurofins Genomics).

531 **Molecular dynamics simulation.** Initial atomic positions of ACE2-bound to SARS-CoV-2  
532 spike (7KNB, <https://www.rcsb.org/structure/7KNB>) respectably the post-fusion structure of  
533 SARS-CoV-2 spike glycoprotein (PDB id 6M3W <https://www.rcsb.org/structure/6m3w>) were  
534 obtained from the Protein Data Bank (Bernstein et al., 1977). Equilibrations (300 K for 0.5 ns)  
535 were performed by ReaxFF (reactive molecular dynamic) simulations (Adri C. T. van Duin et  
536 al., 2001) within the Amsterdam Modelling Suite 2020 (<http://www.scm.com>). Based on the  
537 equilibrated structures, amino acids from the Wuhan-1 spike protein were replaced with the  
538 respective amino acids from Omicron BA.1 and BA.2 spike protein. These modified structures  
539 were additionally equilibrated (300 K for 0.5 ns) ReaxFF (reactive molecular dynamic) within  
540 an NVT while coupling the system to a Berendsen heat bath (T = 300 K with a coupling constant  
541 of 100 fs). The interaction energies were obtained by averaging over the last 0.1 ns of these  
542 simulations. The Visual Molecular Dynamics program (VMD 1.9.3) (Humphrey et al., 1996)  
543 was used for all visualizations.

544 **Pseudoparticle Production.** To produce pseudotyped VSV(GFP) $\Delta$ G particles, HEK293T cells  
545 were transfected with Spike-expressing vectors using polyethyleneimine (PEI 1 mg/ml in H<sub>2</sub>O).  
546 Twenty-four hours post-transfection, the cells were infected with VSV $\Delta$ G(GFP)\*VSV-G at a  
547 MOI of 3. The inoculum was removed 1 hour post-infection. Pseudotyped VSV $\Delta$ G-GFP particles  
548 were harvested 16 h post-infection. Remaining cell debris were removed by centrifugation (500  
549  $\times$  g for 5 min). Residual particles carrying VSV-G were blocked by adding 10% (v/v) of I1-  
550 Hybridoma supernatant (I1, mouse hybridoma supernatant from CRL-2700; ATCC) to the cell  
551 culture supernatant.

552 **Infection Assay.** Caco-2 cells were infected with 100  $\mu$ l of VSV $\Delta$ G-GFP pseudo particles in 96  
553 well format. GFP-positive cells were automatically counted using a Cytation 3 microplate reader  
554 (BioTek Instruments).

555 **Pseudoparticle inhibition.** 50  $\mu$ l of VSV $\Delta$ G-GFP pseudo particles were preincubated for 30  
556 min at RT with the indicated amounts of monoclonal antibodies (Bamlanivimab, Imdevimab,  
557 Casivirimab) or sera from fully BNT162b2 vaccinated individuals and transduced on CaCo-2  
558 cells in 96 well format. 24 hours after infection, GFP-positive cells were automatically counted  
559 by a Cytation 3 microplate reader (BioTek Instruments).

560 **Sera from vaccinated individuals.** Blood samples of fully BNT162b2 vaccinated individuals  
561 were obtained after the participants information and written consent. Samples were collected  
562 13–30 days after the second vaccination using S-Monovette Serum Gel tubes (Sarstedt). Before

563 use, the serum was heat-treated at 56 °C for 30 min. Ethics approval was provided by the Ethic  
564 Committee of Ulm University (vote 99/21– FSt/Sta).

565 **Whole-cell and cell-free lysates.** To prepare whole-cell lysates, cells were collected and washed  
566 in phosphate-buffered Saline (PBS), pelleted and lysed in transmembrane lysis buffer, containing  
567 protease inhibitor (1:500). After 5 min of incubation on ice, supernatants were cleared by  
568 centrifugation (4 °C, 20 min, 20,817 × g). To prepare WB lysates of viral particles, the  
569 supernatants were layered on a cushion of 20% sucrose and centrifuged (4 °C, 90 min, 20,817 ×  
570 g). The virus pellet was lysed in transmembrane lysis buffer, mixed with 4x Protein Sample  
571 Loading Buffer (LI-COR) containing 10% β-mercaptoethanol (Sigma Aldrich) and denaturated  
572 at 95 °C for 10 min.

573 **SDS-PAGE and immunoblotting.** SDS-PAGE and immunoblotting was performed as  
574 previously described (Zech et al. 2021). In brief, whole cell lysates were mixed with 4x Protein  
575 Sample Loading Buffer (LI-COR) containing 10% β-mercaptoethanol (Sigma Aldrich), heated  
576 at 95 °C for 20 min, separated on NuPAGE 4-12% Bis-Tris Gels (Invitrogen) for 90 min at 120  
577 V and blotted at constant 30 V for 30 min onto Immobilon-FL PVDF membrane. After the  
578 transfer, the membrane was blocked in 1% Casein in PBS. Proteins were stained using primary  
579 antibodies directed against rabbit anti-V5 (Cell Signaling #13202; 1:1000), VSV-M (Absolute  
580 Antibody, 23H12, #Ab01404-2.0; 1:2000), actin (Anti-beta Actin antibody Abcam, ab8227,  
581 1:5000,) and Infrared Dye labeled secondary antibodies (LI-COR IRDye) IRDye 800CW Goat  
582 anti-Mouse #926-32210, IRDye 680CW Goat anti-Rabbit (#925-68071), all 1:20,000. Proteins  
583 were detected using a LI-COR Odyssey scanner and band intensities were quantified using LI-  
584 COR Image Studio version 5.

585 **ACE2 interaction assay.** HEK293T cells expressing Spike were collected 48 h after the  
586 transfection, washed with phosphate-buffered saline (PBS), lysed in a non-denaturing lysis  
587 buffer. Interaction between Spike protein and ACE2 was assessed through a Spike-ACE2  
588 binding assay kit (COVID-19 Spike-ACE2 binding assay II, Ray Bio). Briefly, 10 µl of WCLs  
589 were diluted 1:5 in 1x assay diluent buffer (RayBio), added to ACE2 coated wells (RayBio) and  
590 incubated for 2 h with shaking. After washing extensively with the provided wash buffer  
591 (RayBio, #EL-ITEMB), the wells were incubated 1 h with 100 µl anti-V5(MS) (1:1,000, Cell  
592 Signalling, #80076), washed and incubated for 1 h with 100 µl anti-MS-HRP (1:1,000, RayBio).  
593 After washing, the samples were incubated with 50 µl of TMB Substrate Solution (RayBio, #EL-



594 TMB) for 30 min. The reaction was stopped by the addition of 50  $\mu$ l Stop Solution (RayBio,  
595 #ELSTOP) and absorbance was measured at 450 nm with a baseline correction at 650 nm.

596 **Immunofluorescence.** HEK293T cells were plated in 12-well tissue culture dishes on 13-mm  
597 round borosilicate cover slips pre-coated with poly-L-lysine. 24 hours after, the cells were  
598 transfected with expression constructs for Spike protein using polyethyleneimine (PEI 1 mg/ml  
599 in H<sub>2</sub>O). 24 hours after transfection, cells were washed with cold PBS and fixed in 4%  
600 paraformaldehyde solution (PFA) for 20 min at RT, permeabilized and blocked in PBS  
601 containing 0.5% Triton X-100 and 5% FCS for 30 min at RT. Thereafter, samples were washed  
602 with PBS and incubated for 2 h at 4°C with primary antibody (anti-V5(MS) (1:1,000, Cell  
603 Signalling, #80076)) diluted in PBS. The samples were washed with PBS/0.1% Tween 20 and  
604 incubated in the dark for 2 h at 4°C with the secondary antibody (Alexa Fluor-647-conjugated  
605 anti-mouse antibody, 1:1000, Thermo Fisher Scientific) and 500 ng/ml DAPI. After washing  
606 with PBS-T and water, cover slips were mounted on microscopy slides. Images were acquired  
607 using a Zeiss LSM800 confocal laser scanning microscope with ZEN imaging software (Zeiss).

608 **Quantification of syncytia formation.** To detect formation of syncytia, HEK293T cells were  
609 co-transfected with ACE2 and Spike expressing vectors using polyethyleneimine (PEI 1 mg/ml  
610 in H<sub>2</sub>O). Twenty-four hours post-transfection, fluorescence microscopy images were acquired  
611 using the Cytation 3 microplate reader (BioTek Instruments) and the GFP area was quantified  
612 using ImageJ.

613 **Statistical analysis.** Statistical analyses were performed using GraphPad PRISM 9.2 (GraphPad  
614 Software). P-values were determined using two-tailed Student's t-test with Welch's correction  
615 or One-Way ANOVA with multiple comparison against the Wuhan-Hu-1 values. Unless  
616 otherwise stated, data are shown as the mean of at least three independent experiments  $\pm$  SEM.  
617 Significant differences are indicated as \* $p < 0.05$ ; \*\* $p < 0.01$ ; \*\*\* $p < 0.001$ .

618

619 **Key resources table**

| REAGENT or RESOURCE                                  | SOURCE                                                                                     | IDENTIFIER                      |
|------------------------------------------------------|--------------------------------------------------------------------------------------------|---------------------------------|
| <b>Antibodies</b>                                    |                                                                                            |                                 |
| Mouse monoclonal anti-V5 Spike                       | Cell Signaling Technology                                                                  | Cat#80076S                      |
| Alexa Fluor 647 goat anti-mouse IgG (H+L)            | Thermo Fisher                                                                              | Cat#A-11004; RRID: AB_2534072   |
| Rabbit monoclonal anti-V5 Spike                      | Cell Signaling Technology                                                                  | Cat#13202S; RRID: AB_2687461    |
| Mouse monoclonal anti-VSV-M (23H12)                  | Absolute Antibody                                                                          | Cat#Ab01404-2.0                 |
| Rabbit polyclonal anti-beta Actin                    | Abcam                                                                                      | Cat#ab8227; RRID: AB_2305186    |
| IRDye 800CW Goat anti-Mouse IgG (H + L)              | LI-COR                                                                                     | Cat#926-32210; RRID: AB_621842  |
| IRDye 680CW Goat anti-Rabbit IgG (H + L)             | LI-COR                                                                                     | Cat#925-68071; RRID: AB_2721181 |
| Bamlanivimab                                         | Lilly Pharma                                                                               | LY-CoV555 700 mg; Lot#D336907A  |
| Imdevimab                                            | Roche                                                                                      | REGN10897 1332 mg; Lot#N7534    |
| Casivirivimab                                        | Roche                                                                                      | REGN10933 1332 mg; Lot#N7533    |
| <b>Bacterial and virus strains</b>                   |                                                                                            |                                 |
| NEB® 5-alpha Competent E. coli (High Efficiency)     | New England BioLabs                                                                        | Cat#C2987H                      |
| XL2-Blue MRF'™ Ultracompetent cells                  | Agilent Technologies                                                                       | Cat#200151                      |
| VSVΔG(GFP)*VSV-G                                     | Kindly provided by Prof. Karl-Klaus Conzelmann, Institute of Virology, LMU Munich, Germany | N/A                             |
| <b>Biological samples</b>                            |                                                                                            |                                 |
| Human sera                                           | This study                                                                                 | N/A                             |
| <b>Chemicals, peptides, and recombinant proteins</b> |                                                                                            |                                 |
| DAPI                                                 | Sigma-Aldrich                                                                              | D9542-1MG; CAS: 28718-90-3      |
| L-Glutamine                                          | PANBiotech                                                                                 | Cat#P04-80100                   |
| Penicillin-Streptomycin                              | PANBiotech                                                                                 | Cat#P06-07100                   |
| Complete ULTRA inhibitor cocktail tablet             | Roche                                                                                      | Cat#05892791001                 |

|                                            |                     |                           |
|--------------------------------------------|---------------------|---------------------------|
| 2-Mercaptoethanol                          | Sigma-Aldrich       | Cat#M6250-100ML           |
| Polyethyleneimine (PEI)                    | Sigma-Aldrich       | Cat#408727-100ML          |
| 4 % Paraformaldehyde (PFA)                 | ChemCruz            | Cat#sc-281692             |
| 4X Protein Sample Loading Buffer           | LI-COR              | Cat#928-40004             |
| Glycerol                                   | Sigma-Aldrich       | Cat#G5516-500ML           |
| Mowiol 4-88                                | ROTH                | Cat#0713.1                |
| Tween 20                                   | Sigma-Aldrich       | Cat#P7949-500ML           |
| Tris-Cl                                    | Sigma-Aldrich       | Cat#T5941-500G            |
| DABCO (1,4-diazabicyclo-[2,2,2]-octane)    | ROTH                | Cat#0718.1                |
| HEPES                                      | Sigma-Aldrich       | Cat#H3375-250G            |
| NaCl                                       | Sigma-Aldrich       | Cat#106404                |
| Triton X-100                               | Sigma-Aldrich       | Cat#T9284-100ML           |
| Ethylenediaminetetraacetic acid (EDTA)     | Sigma-Aldrich       | Cat#EDS-100G              |
| Trypsin/EDTA 0.05 % / 0.02 %               | PANBiotech          | Cat#P10-023100            |
| Dulbecco's Phosphate Buffered Saline (PBS) | Thermo Fisher       | Cat#14190094              |
| Poly-L-Lysine                              | Sigma-Aldrich       | Cat#P6282-5MG             |
| Fetal Bovine Serum                         | Thermo Fisher       | Cat#10270106              |
| 0.5 % Trypsin-EDTA                         | Thermo Fisher       | Cat#15400054              |
| Blocker Casein in PBS                      | Thermo Fisher       | Cat#37528                 |
| Critical commercial assays                 |                     |                           |
| Q5 Site-Directed Mutagenesis Kit           | New England BioLabs | Cat#E0554                 |
| COVID-19 Spike-ACE2 Binding Assay Kit      | RayBiotech          | Cat#QHD43416              |
| Deposited data                             |                     |                           |
| Raw and analyzed data                      | This study          | N/A                       |
| Experimental models: Cell lines            |                     |                           |
| Human: HEK293T cells                       | ATCC                | CRL-3216; RRID: CVCL_0063 |
| Human: CaCo-2 cells                        | ATCC                | HTB-37; RRID: CVCL_0025   |
| Mouse: I1 Hybridoma cells                  | ATCC                | CRL-2700; RRID: CVCL_G654 |
| Experimental models: Organisms/strains     |                     |                           |

|                                                                   |                                                         |                                                                                          |
|-------------------------------------------------------------------|---------------------------------------------------------|------------------------------------------------------------------------------------------|
| Oligonucleotides                                                  |                                                         |                                                                                          |
| Primers for designing the Omicron Spike mutants, see Table Primer | This study                                              | N/A                                                                                      |
| Recombinant DNA                                                   |                                                         |                                                                                          |
| Plasmid: pCG_SARS-CoV-2-Spike-IRES_eGFP                           | This study                                              | N/A                                                                                      |
| Plasmid: SARS-CoV-2 Spike Protein (YP_009724390.1)                | R&D                                                     | Cat#RDC3074                                                                              |
| Plasmid: pCG_SARS-CoV-2-S (1.617)                                 | Stefan Pöhlmann, DPZ, Göttingen, Germany                | N/A                                                                                      |
| Plasmid: pCG1_SARS-2-S (B.1.1.529)                                | Stefan Pöhlmann, DPZ, Göttingen, Germany                | N/A                                                                                      |
| Plasmid: pCG1_SARS-2-SΔ18 (BA.2)                                  | Stefan Pöhlmann, DPZ, Göttingen, Germany                | N/A                                                                                      |
| Software and algorithms                                           |                                                         |                                                                                          |
| GraphPad Prism Version 9.2                                        | GraphPad Software, Inc.                                 | <a href="https://www.graphpad.com">https://www.graphpad.com</a><br>RRID: SCR_002798      |
| LI-COR Image Studio Version 5.2                                   | LI-COR                                                  | <a href="http://www.licor.com/">www.licor.com/</a><br>RRID: SCR_015795                   |
| CorelDRAW 2021 (64-Bit)                                           | Corel Corporation                                       | <a href="http://www.coreldraw.com/">www.coreldraw.com/</a><br>RRID: SCR_014235           |
| BioTek Gen5 3.04                                                  | Agilent Technologies                                    | <a href="http://www.biotek.com">www.biotek.com</a>                                       |
| Fiji 1.53                                                         | National Institutes of Health (NIH)                     | <a href="http://imagej.nih.gov/ij/">imagej.nih.gov/ij/</a><br>RRID: SCR_003070           |
| Amsterdam Modeling Suite 2020                                     | Software for Chemistry & Materials BV                   | <a href="http://www.scm.com">www.scm.com</a>                                             |
| Visual Molecular Dynamics 1.9.3                                   | NIH Center for Macromolecular Modeling & Bioinformatics | <a href="http://www.ks.uiuc.edu/">www.ks.uiuc.edu/</a>                                   |
| ZEN (black edition)                                               | Carl Zeiss Microscopy GmbH                              | <a href="http://www.microshop.zeiss.com">www.microshop.zeiss.com</a><br>RRID: SCR_013672 |
| Other                                                             |                                                         |                                                                                          |
| Dulbecco's Modified Eagle Medium                                  | Thermo Fisher                                           | Cat#41965039                                                                             |
| Roswell Park Memorial Institute Medium 1640                       | Thermo Fisher                                           | Cat#21875034                                                                             |

|                                 |                     |                |
|---------------------------------|---------------------|----------------|
| MEM Non-essential amino acids   | Thermo Fisher       | Cat#11140035   |
| Opti-MEM Reduced Serum Media    | Thermo Fisher       | Cat#31985047   |
| Saccharose                      | Sigma-Aldrich       | Cat#S0389-500G |
| NuPAGE 4-12% Bis-Tris Gels      | Invitrogen          | Cat#NP0323BOX  |
| Immobilon-FL PVDF membrane      | Sigma-Aldrich       | Cat#IPFL00010  |
| Borosilicate Cover Slips, 13 mm | VWR                 | Cat#6310150    |
| XbaI restriction enzyme         | New England BioLabs | Cat#R0145      |
| MluI restriction enzyme         | New England BioLabs | Cat#R0198      |

620

621

## 622 REFERENCES

- 623 Adri C. T. van Duin, Siddharth Dasgupta, Francois Lorant, and William A. Goddard (2001).  
624 ReaxFF: A Reactive Force Field for Hydrocarbons. *J. Phys. Chem. A*, 105, 9396–9409.
- 625 Aggarwal, A., Stella, A.O., Walker, G., Akerman, A., Milogiannakis, V., Brilot, F., Amatayakul-  
626 Chantler, S., Roth, N., Coppola, G., Schofield, P., et al. (2021). SARS-CoV-2 Omicron: evasion  
627 of potent humoral responses and resistance to clinical immunotherapeutics relative to viral  
628 variants of concern. medRxiv, doi: <https://doi.org/10.1101/2021.12.14.21267772>
- 629 Altarawneh, H.N., Chemaitelly, H., Hasan, M.R., Ayoub, H.H., Qassim, S., AlMukdad, S.,  
630 Coyle, P., Yassine, H.M., Al-Khatib, H.A., Benslimane, F.M., et al. (2022). Protection against  
631 the Omicron Variant from Previous SARS-CoV-2 Infection. *New England Journal of Medicine*  
632 386, 1288–1290. <https://doi.org/10.1056/NEJMc2200133>.
- 633 Andrews, N., Stowe, J., Kirsebom, F., Toffa, S., Rickeard, T., Gallagher, E., Gower, C., Kall,  
634 M., Groves, N., O’Connell, A.-M., et al. (2021). Effectiveness of COVID-19 vaccines against  
635 the Omicron (B.1.1.529) variant of concern. medRxiv, doi: [https://doi.org/10.1101/2021.12.14.](https://doi.org/10.1101/2021.12.14.21267615)  
636 21267615.
- 637 Bernstein, F.C., Koetzle, T.F., Williams, G.J., Meyer, E.F., Brice, M.D., Rodgers, J.R., Kennard,  
638 O., Shimanouchi, T., and Tasumi, M. (1977). The Protein Data Bank: a computer-based archival  
639 file for macromolecular structures. *Journal of Molecular Biology* 112, 535–542.  
640 [https://doi.org/10.1016/s0022-2836\(77\)80200-3](https://doi.org/10.1016/s0022-2836(77)80200-3).
- 641 Cameroni, E., Saliba, C., Bowen, J.E., Rosen, L.E., Culap, K., Pinto, D., Marco, A.D., Zepeda,  
642 S.K., Iulio, J. di, Zatta, F., et al. (2021). Broadly neutralizing antibodies overcome SARS-CoV-  
643 2 Omicron antigenic shift. *Nature* 602, 664–670.
- 644 Cele, S., Jackson, L., Khoury, D.S., Khan, K., Moyo-Gwete, T., Tegally, H., San, J.E., Cromer,  
645 D., Scheepers, C., Amoako, D.G., et al. (2021). Omicron extensively but incompletely escapes  
646 Pfizer BNT162b2 neutralization. *Nature* 602, 654–656.
- 647 Chen, T.-W., Wardill, T.J., Sun, Y., Pulver, S.R., Renninger, S.L., Baohan, A., Schreiter, E.R.,  
648 Kerr, R.A., Orger, M.B., Jayaraman, V., et al. (2013). Ultrasensitive fluorescent proteins for  
649 imaging neuronal activity. *Nature* 499, 295–300.
- 650 Chi, X., Yan, R., Zhang, J., Zhang, G., Zhang, Y., Hao, M., Zhang, Z., Fan, P., Dong, Y., Yang,  
651 Y., et al. (2020). A neutralizing human antibody binds to the N-terminal domain of the Spike  
652 protein of SARS-CoV-2. *Science* 369, 650–655. <https://doi.org/10.1126/science.abc6952>.
- 653 Collie, S., Champion, J., Moultrie, H., Bekker, L.-G., and Gray, G. (2022). Effectiveness of  
654 BNT162b2 Vaccine against Omicron Variant in South Africa. *N Engl J Med* 386, 494–496.  
655 <https://doi.org/10.1056/NEJMc2119270>.
- 656 Dai, L., and Gao, G.F. (2021). Viral targets for vaccines against COVID-19. *Nat Rev Immunol*  
657 21, 73–82. <https://doi.org/10.1038/s41577-020-00480-0>.
- 658 Espenhain, L., Funk, T., Overvad, M., Edslev, S.M., Fonager, J., Ingham, A.C., Rasmussen, M.,  
659 Madsen, S.L., Espersen, C.H., Sieber, R.N., et al. (2021). Epidemiological characterisation of  
660 the first 785 SARS-CoV-2 Omicron variant cases in Denmark, December 2021. *Euro Surveill*  
661 26. <https://doi.org/10.2807/1560-7917.ES.2021.26.50.2101146>.

- 662 Gobeil, S.M.-C., Henderson, R., Stalls, V., Janowska, K., Huang, X., May, A., Speakman, M.,  
663 Beaudoin, E., Manne, K., Li, D., et al. (2022). Structural diversity of the SARS-CoV-2 Omicron  
664 spike. *Molecular Cell*, <https://doi.org/10.1016/j.molcel.2022.03.028>.
- 665 Golcuk, M., Yildiz, A., and Gur, M. (2021). Omicron BA.1 and BA.2 Variants Increase the  
666 Interactions of SARS-CoV-2 Spike Glycoprotein with ACE2. <https://doi.org/10.1101/2021.12.06.471377>.
- 668 Grabowski, F., Kochańczyk, M., and Lipniacki, T. (2022). The spread of SARS-CoV-2 variant  
669 Omicron with the doubling time of 2.0-3.3 days can be explained by immune evasion. *Viruses*  
670 *14*(2), 294; <https://doi.org/10.3390/v14020294>.
- 671 Hadfield, J., Megill, C., Bell, S.M., Huddleston, J., Potter, B., Callender, C., Sagulenko, P.,  
672 Bedford, T., and Neher, R.A. (2018). Nextstrain: real-time tracking of pathogen evolution.  
673 *Bioinformatics* *34*, 4121–4123. <https://doi.org/10.1093/bioinformatics/bty407>.
- 674 Harvey, W.T., Carabelli, A.M., Jackson, B., Gupta, R.K., Thomson, E.C., Harrison, E.M.,  
675 Ludden, C., Reeve, R., Rambaut, A., COVID-19 Genomics UK (COG-UK) Consortium, et al.  
676 (2021). SARS-CoV-2 variants, spike mutations and immune escape. *Nat Rev Microbiol* *19*, 409–  
677 424. <https://doi.org/10.1038/s41579-021-00573-0>.
- 678 Hoffmann, M., Kleine-Weber, H., Schroeder, S., Krüger, N., Herrler, T., Erichsen, S.,  
679 Schiergens, T.S., Herrler, G., Wu, N.-H., Nitsche, A., et al. (2020). SARS-CoV-2 Cell Entry  
680 Depends on ACE2 and TMPRSS2 and Is Blocked by a Clinically Proven Protease Inhibitor. *Cell*  
681 *181*(2):271-280; <https://doi.org/10.1016/j.cell.2020.02.052>.
- 682 Hoffmann, M., Krüger, N., Schulz, S., Cossmann, A., Rocha, C., Kempf, A., Nehlmeier, I.,  
683 Graichen, L., Moldenhauer, A.-S., Winkler, M.S., et al. (2021). The Omicron variant is highly  
684 resistant against antibody-mediated neutralization: Implications for control of the COVID-19  
685 pandemic. *Cell* S0092-8674(21)01495-1. <https://doi.org/10.1016/j.cell.2021.12.032>.
- 686 Huang, K., Zhang, Y., Hui, X., Zhao, Y., Gong, W., Wang, T., Zhang, S., Yang, Y., Deng, F.,  
687 Zhang, Q., et al. (2021). Q493K and Q498H substitutions in Spike promote adaptation of SARS-  
688 CoV-2 in mice. *EBioMedicine* *67*, 103381. <https://doi.org/10.1016/j.ebiom.2021.103381>.
- 689 Humphrey, W., Dalke, A., and Schulten, K. (1996). VMD: visual molecular dynamics. *Journal*  
690 *of Molecular Graphics* *14*, 33–38, 27–28. .
- 691 Iketani, S., Liu, L., Guo, Y., Liu, L., Chan, J.F.-W., Huang, Y., Wang, M., Luo, Y., Yu, J., Chu,  
692 H., et al. (2022). Antibody evasion properties of SARS-CoV-2 Omicron sublineages. *Nature*  
693 <https://doi.org/10.1038/s41586-022-04594-4>.
- 694 Jung, C., Kmiec, D., Koepke, L., Zech, F., Jacob, T., Sparrer, K.M.J., and Kirchhoff, F. (2022).  
695 Omicron: what makes the latest SARS-CoV-2 variant of concern so concerning? *J Virol*  
696 *jvi0207721*. <https://doi.org/10.1128/jvi.02077-21>.
- 697 Karim, F., Moosa, M.Y.S., Gosnell, B.I., Cele, S., Giandhari, J., Pillay, S., Tegally, H.,  
698 Wilkinson, E., San, J.E., Msomi, N., et al. (2021). Persistent SARS-CoV-2 infection and intra-  
699 host evolution in association with advanced HIV infection. *medRxiv*; doi:  
700 <https://doi.org/10.1101/2021.06.03.21258228>.
- 701 Korber, B., Fischer, W.M., Gnanakaran, S., Yoon, H., Theiler, J., Abfalterer, W., Hengartner,  
702 N., Giorgi, E.E., Bhattacharya, T., Foley, B., et al. (2020). Tracking Changes in SARS-CoV-2



- 703 Spike: Evidence that D614G Increases Infectivity of the COVID-19 Virus. *Cell* 182, 812-  
704 827.e19. <https://doi.org/10.1016/j.cell.2020.06.043>.
- 705 Krashes, M.J., Koda, S., Ye, C., Rogan, S.C., Adams, A.C., Cusher, D.S., Maratos-Flier, E.,  
706 Roth, B.L., and Lowell, B.B. (2011). Rapid, reversible activation of AgRP neurons drives  
707 feeding behavior in mice. *J Clin Invest* 121, 1424–1428. <https://doi.org/10.1172/JCI46229>.
- 708 Lam, S.D., Waman, V.P., Orenge, C., and Lees, J. (2021). Insertions in the SARS-CoV-2 Spike  
709 N-Terminal Domain May Aid COVID-19 Transmission. *bioRxiv*; doi:  
710 <https://doi.org/10.1101/2021.12.06.471394>.
- 711 Langmead, B., and Salzberg, S.L. (2012). Fast gapped-read alignment with Bowtie 2. *Nat*  
712 *Methods* 9, 357–359. <https://doi.org/10.1038/nmeth.1923>.
- 713 Letko, M., Marzi, A., and Munster, V. (2020). Functional assessment of cell entry and receptor  
714 usage for SARS-CoV-2 and other lineage B betacoronaviruses. *Nature Microbiology* 5, 562–  
715 569. <https://doi.org/10.1038/s41564-020-0688-y>.
- 716 Li, H., Handsaker, B., Wysoker, A., Fennell, T., Ruan, J., Homer, N., Marth, G., Abecasis, G.,  
717 Durbin, R., and 1000 Genome Project Data Processing Subgroup (2009). The Sequence  
718 Alignment/Map format and SAMtools. *Bioinformatics* 25, 2078–2079.  
719 <https://doi.org/10.1093/bioinformatics/btp352>.
- 720 Liu, L., Iketani, S., Guo, Y., Chan, J.F.-W., Wang, M., Liu, L., Luo, Y., Chu, H., Huang, Y.,  
721 Nair, M.S., et al. (2022). Striking antibody evasion manifested by the Omicron variant of SARS-  
722 CoV-2. *Nature* 602, 676–681. <https://doi.org/10.1038/s41586-021-04388-0>.
- 723 Lu, L., Mok, B.W.-Y., Chen, L.-L., Chan, J.M.-C., Tsang, O.T.-Y., Lam, B.H.-S., Chuang,  
724 V.W.-M., Chu, A.W.-H., Chan, W.-M., Ip, J.D., et al. (2021). Neutralization of SARS-CoV-2  
725 Omicron variant by sera from BNT162b2 or Coronavac vaccine recipients. *Clin Infect Dis*  
726 *ciab1041*. <https://doi.org/10.1093/cid/ciab1041>.
- 727 Maaroufi, H. (2022). The N764K and N856K mutations in SARS-CoV-2 Omicron BA.1 S  
728 protein generate potential cleavage sites for SKI-1/S1P protease. 2022.01.21.477298.  
729 <https://doi.org/10.1101/2022.01.21.477298>.
- 730 Mannar, D., Saville, J.W., Zhu, X., Srivastava, S.S., Berezuk, A.M., Tuttle, K., Marquez, C.,  
731 Sekirov, I., and Subramaniam, S. (2022). SARS-CoV-2 Omicron Variant: ACE2 Binding, Cryo-  
732 EM Structure of Spike Protein-ACE2 Complex and Antibody Evasion. *Science* 375, 760-764.
- 733 Meng, B., Ferreira, I.A.T.M., Abdullahi, A., Goonawardane, N., Saito, A., Kimura, I.,  
734 Yamasoba, D., Gerba, P.P., Fatihi, S., Rathore, S., et al. (2022). SARS-CoV-2 Omicron spike  
735 mediated immune escape and tropism shift. *Nature* 603, 706–714.
- 736 Moore, P.L., and Baden, L.R. (2022). Omicron — Decoupling Infection from Severe Disease. *N*  
737 *Engl J Med* 386, 1361–1362. <https://doi.org/10.1056/NEJMe2201812>.
- 738 Neumann, C.J., and Nüsslein-Volhard, C. (2000). Patterning of the Zebrafish Retina by a Wave  
739 of Sonic Hedgehog Activity. *Science* 289, 2137–2139. <https://doi.org/10.1126/science.289.5487.2137>.
- 741 Oh, E., Zhu, J.-Y., and Wang, Z.-Y. (2012). Interaction between BZR1 and PIF4 integrates  
742 brassinosteroid and environmental responses. *Nat Cell Biol* 14, 802–809.  
743 <https://doi.org/10.1038/ncb2545>.



- 744 Planas, D., Veyer, D., Baidaliuk, A., Staropoli, I., Guivel-Benhassine, F., Rajah, M.M.,  
745 Planchais, C., Porrot, F., Robillard, N., Puech, J., et al. (2021). Reduced sensitivity of SARS-  
746 CoV-2 variant Delta to antibody neutralization. *Nature* 596, 276–280.  
747 <https://doi.org/10.1038/s41586-021-03777-9>.
- 748 Polack, F.P., Thomas, S.J., Kitchin, N., Absalon, J., Gurtman, A., Lockhart, S., Perez, J.L., Pérez  
749 Marc, G., Moreira, E.D., Zerbini, C., et al. (2020). Safety and Efficacy of the BNT162b2 mRNA  
750 Covid-19 Vaccine. *N Engl J Med* 383, 2603–2615. <https://doi.org/10.1056/NEJMoa2034577>.
- 751 Pulliam, J.R.C., Schalkwyk, C. van, Govender, N., Gottberg, A. von, Cohen, C., Groome, M.J.,  
752 Dushoff, J., Mlisana, K., and Moultrie, H. (2022). Increased risk of SARS-CoV-2 reinfection  
753 associated with emergence of the Omicron variant in South Africa. *Science*; DOI:  
754 10.1126/science.abn4947
- 755 Rath, S.L., Padhi, A.K., and Mandal, N. (2022). Scanning the RBD-ACE2 molecular interactions  
756 in Omicron variant. *Biochemical and Biophysical Research Communications* 592, 18–23.  
757 <https://doi.org/10.1016/j.bbrc.2022.01.006>.
- 758 Rau, C., Wisniewski, N., Orozco, L., Bennett, B., Weiss, J., and Lusic, A. (2013). Maximal  
759 information component analysis: a novel non-linear network analysis method. *Frontiers in*  
760 *Genetics* 4, 28.
- 761 Riepler, L., Rössler, A., Falch, A., Volland, A., Borena, W., von Laer, D., and Kimpel, J. (2020).  
762 Comparison of Four SARS-CoV-2 Neutralization Assays. *Vaccines (Basel)* 9, 13.  
763 <https://doi.org/10.3390/vaccines9010013>.
- 764 Sagulenko, P., Puller, V., and Neher, R.A. (2018). TreeTime: Maximum-likelihood  
765 phylodynamic analysis. *Virus Evol* 4, vex042. <https://doi.org/10.1093/ve/vex042>.
- 766 Sarkar, R., Lo, M., Saha, R., Dutta, S., and Chawla-Sarkar, M. (2021). S glycoprotein diversity  
767 of the Omicron variant. medRxiv; doi: <https://doi.org/10.1101/2021.12.04.21267284>
- 768 Schmidt, F.I., Lu, A., Chen, J.W., Ruan, J., Tang, C., Wu, H., and Ploegh, H.L. (2016). A single  
769 domain antibody fragment that recognizes the adaptor ASC defines the role of ASC domains in  
770 inflammasome assembly. *The Journal of Experimental Medicine* 213, 771–790.  
771 <https://doi.org/10.1084/jem.20151790>.
- 772 Schneider, C.A., Rasband, W.S., and Eliceiri, K.W. (2012). NIH Image to ImageJ: 25 years of  
773 image analysis. *Nat Methods* 9, 671–675. <https://doi.org/10.1038/nmeth.2089>.
- 774 Sun, S., Gu, H., Cao, L., Chen, Q., Ye, Q., Yang, G., Li, R.-T., Fan, H., Deng, Y.-Q., Song, X.,  
775 et al. (2021). Characterization and structural basis of a lethal mouse-adapted SARS-CoV-2. *Nat*  
776 *Commun* 12, 5654. <https://doi.org/10.1038/s41467-021-25903-x>.
- 777 Suzuki, R., Yamasoba, D., Kimura, I., Wang, L., Kishimoto, M., Ito, J., Morioka, Y., Nao, N.,  
778 Nasser, H., Uriu, K., et al. (2022). Attenuated fusogenicity and pathogenicity of SARS-CoV-2  
779 Omicron variant. *Nature* 603, 700–705. <https://doi.org/10.1038/s41586-022-04462-1>.
- 780 Sztain, T., Ahn, S.-H., Bogetti, A.T., Casalino, L., Goldsmith, J.A., Seitz, E., McCool, R.S.,  
781 Kearns, F.L., Acosta-Reyes, F., Maji, S., et al. (2021). A glycan gate controls opening of the  
782 SARS-CoV-2 spike protein. *Nat Chem* 13, 963–968. [https://doi.org/10.1038/s41557-021-00758-](https://doi.org/10.1038/s41557-021-00758-3)  
783 3.

- 784 Tao, K., Tzou, P.L., Nouhin, J., Gupta, R.K., de Oliveira, T., Kosakovsky Pond, S.L., Fera, D.,  
785 and Shafer, R.W. (2021). The biological and clinical significance of emerging SARS-CoV-2  
786 variants. *Nat Rev Genet* 22, 757–773. <https://doi.org/10.1038/s41576-021-00408-x>.
- 787 Thoreen, C.C., Kang, S.A., Chang, J.W., Liu, Q., Zhang, J., Gao, Y., Reichling, L.J., Sim, T.,  
788 Sabatini, D.M., and Gray, N.S. (2009). An ATP-competitive mammalian target of rapamycin  
789 inhibitor reveals rapamycin-resistant functions of mTORC1. *J Biol Chem* 284, 8023–8032.  
790 <https://doi.org/10.1074/jbc.M900301200>.
- 791 Tian, S., Huang, Q., Fang, Y., and Wu, J. (2011). FurinDB: A Database of 20-Residue Furin  
792 Cleavage Site Motifs, Substrates and Their Associated Drugs. *OPEN ACCESS Int. J. Mol. Sci*  
793 *12*, 12. <https://doi.org/10.3390/ijms12021060>.
- 794 VanBlargan, L.A., Errico, J.M., Halfmann, P., Zost, S.J., Crowe, J.E., Purcell, L.A., Kawaoka,  
795 Y., Corti, D., Fremont, D.H., and Diamond, M. (2022). An infectious SARS-CoV-2 B.1.1.529  
796 Omicron virus escapes neutralization by several therapeutic monoclonal antibodies. *Nature*  
797 *Medicine* 28, 490–495.
- 798 Viana, R., Moyo, S., Amoako, D.G., Tegally, H., Scheepers, C., Althaus, C.L., Anyaneji, U.J.,  
799 Bester, P.A., Boni, M.F., Chand, M., et al. (2022). Rapid epidemic expansion of the SARS-CoV-  
800 2 Omicron variant in southern Africa. *Nature* <https://doi.org/10.1038/d41586-021-03832-5>.
- 801 Walls, A.C., Park, Y.-J., Tortorici, M.A., Wall, A., McGuire, A.T., and Velesler, D. (2020).  
802 Structure, Function, and Antigenicity of the SARS-CoV-2 Spike Glycoprotein. *Cell* 181, 281-  
803 292.e6. <https://doi.org/10.1016/j.cell.2020.02.058>.
- 804 Wei, C., Shan, K.-J., Wang, W., Zhang, S., Huan, Q., and Qian, W. (2021). Evidence for a mouse  
805 origin of the SARS-CoV-2 Omicron variant. *J Genet Genomics*. 48, 1111–1121.
- 806 Wilhelm, A., Widera, M., Grikscheit, K., Toptan, T., Schenk, B., Pallas, C., Metzler, M.,  
807 Kohmer, N., Hoehl, S., Helfritz, F.A., et al. (2021). Reduced Neutralization of SARS-CoV-2  
808 Omicron Variant by Vaccine Sera and Monoclonal Antibodies. *medRxiv*; doi:  
809 <https://doi.org/10.1101/2021.12.07.21267432>.
- 810 Wolter, N., Jassat, W., Walaza, S., Welch, R., Moultrie, H., Groome, M., Amoako, D.G., Everatt,  
811 J., Bhiman, J.N., Scheepers, C., et al. (2022). Early assessment of the clinical severity of the  
812 SARS-CoV-2 omicron variant in South Africa: a data linkage study. *Lancet* 399, 437–446.  
813 [https://doi.org/10.1016/S0140-6736\(22\)00017-4](https://doi.org/10.1016/S0140-6736(22)00017-4).
- 814 Wrapp, D., Wang, N., Corbett, K.S., Goldsmith, J.A., Hsieh, C.-L., Abiona, O., Graham, B.S.,  
815 and McLellan, J.S. (2020). Cryo-EM structure of the 2019-nCoV spike in the prefusion  
816 conformation. *Science* 367, 1260–1263. <https://doi.org/10.1126/science.abb2507>.
- 817 Wrobel, A.G., Benton, D.J., Roustan, C., Borg, A., Hussain, S., Martin, S.R., Rosenthal, P.B.,  
818 Skehel, J.J., and Gamblin, S.J. (2022). Evolution of the SARS-CoV-2 spike protein in the human  
819 host. *Nat Commun* 13, 1178. <https://doi.org/10.1038/s41467-022-28768-w>.
- 820 Xia, S., Chan, J.F.-W., Wang, L., Jiao, F., Chik, K.K.-H., Chu, H., Lan, Q., Xu, W., Wang, Q.,  
821 Wang, C., et al. (2022). Peptide-based pan-CoV fusion inhibitors maintain high potency against  
822 SARS-CoV-2 Omicron variant. *Cell Res* 32, 404–406. <https://doi.org/10.1038/s41422-022-00617-x>.

- 824 Yamasoba, D., Kimura, I., Nasser, H., Morioka, Y., Nao, N., Ito, J., Uriu, K., Tsuda, M.,  
825 Zahradnik, J., Shirakawa, K., et al. (2022). Virological characteristics of SARS-CoV-2 BA.2  
826 variant. 2022.02.14.480335. <https://doi.org/10.1101/2022.02.14.480335>.
- 827 Yurkovetskiy, L., Wang, X., Pascal, K.E., Tomkins-Tinch, C., Nyalile, T.P., Wang, Y., Baum,  
828 A., Diehl, W.E., Dauphin, A., Carbone, C., et al. (2020). Structural and Functional Analysis of  
829 the D614G SARS-CoV-2 Spike Protein Variant. *Cell* 183, 739-751.e8.  
830 <https://doi.org/10.1016/j.cell.2020.09.032>.
- 831 Zhang, J., Cai, Y., Lavine, C.L., Peng, H., Zhu, H., Anand, K., Tong, P., Gautam, A., Mayer,  
832 M.L., Rits-Volloch, S., et al. (2022). Structural and functional impact by SARS-CoV-2 Omicron  
833 spike mutations. *Cell Reports* 110729. <https://doi.org/10.1016/j.celrep.2022.110729>.
- 834 Zhang, L., Li, Q., Liang, Z., Li, T., Liu, S., Cui, Q., Nie, J., Wu, Q., Qu, X., Huang, W., et al.  
835 (2021). The significant immune escape of pseudotyped SARS-CoV-2 Variant Omicron. *Emerg*  
836 *Microbes Infect* 1–11. <https://doi.org/10.1080/22221751.2021.2017757>.
- 837 Zhao, H., Lu, L., Peng, Z., Chen, L.-L., Meng, X., Zhang, C., Ip, J.D., Chan, W.-M., Chu, A.W.-  
838 H., Chan, K.-H., et al. (2021). SARS-CoV-2 Omicron variant shows less efficient replication  
839 and fusion activity when compared with delta variant in TMPRSS2-expressed cells. *Emerging*  
840 *Microbes & Infections* 0, 1–18. <https://doi.org/10.1080/22221751.2021.2023329>.
- 841

Fig. 1

Pastorio, Zech *et al.*

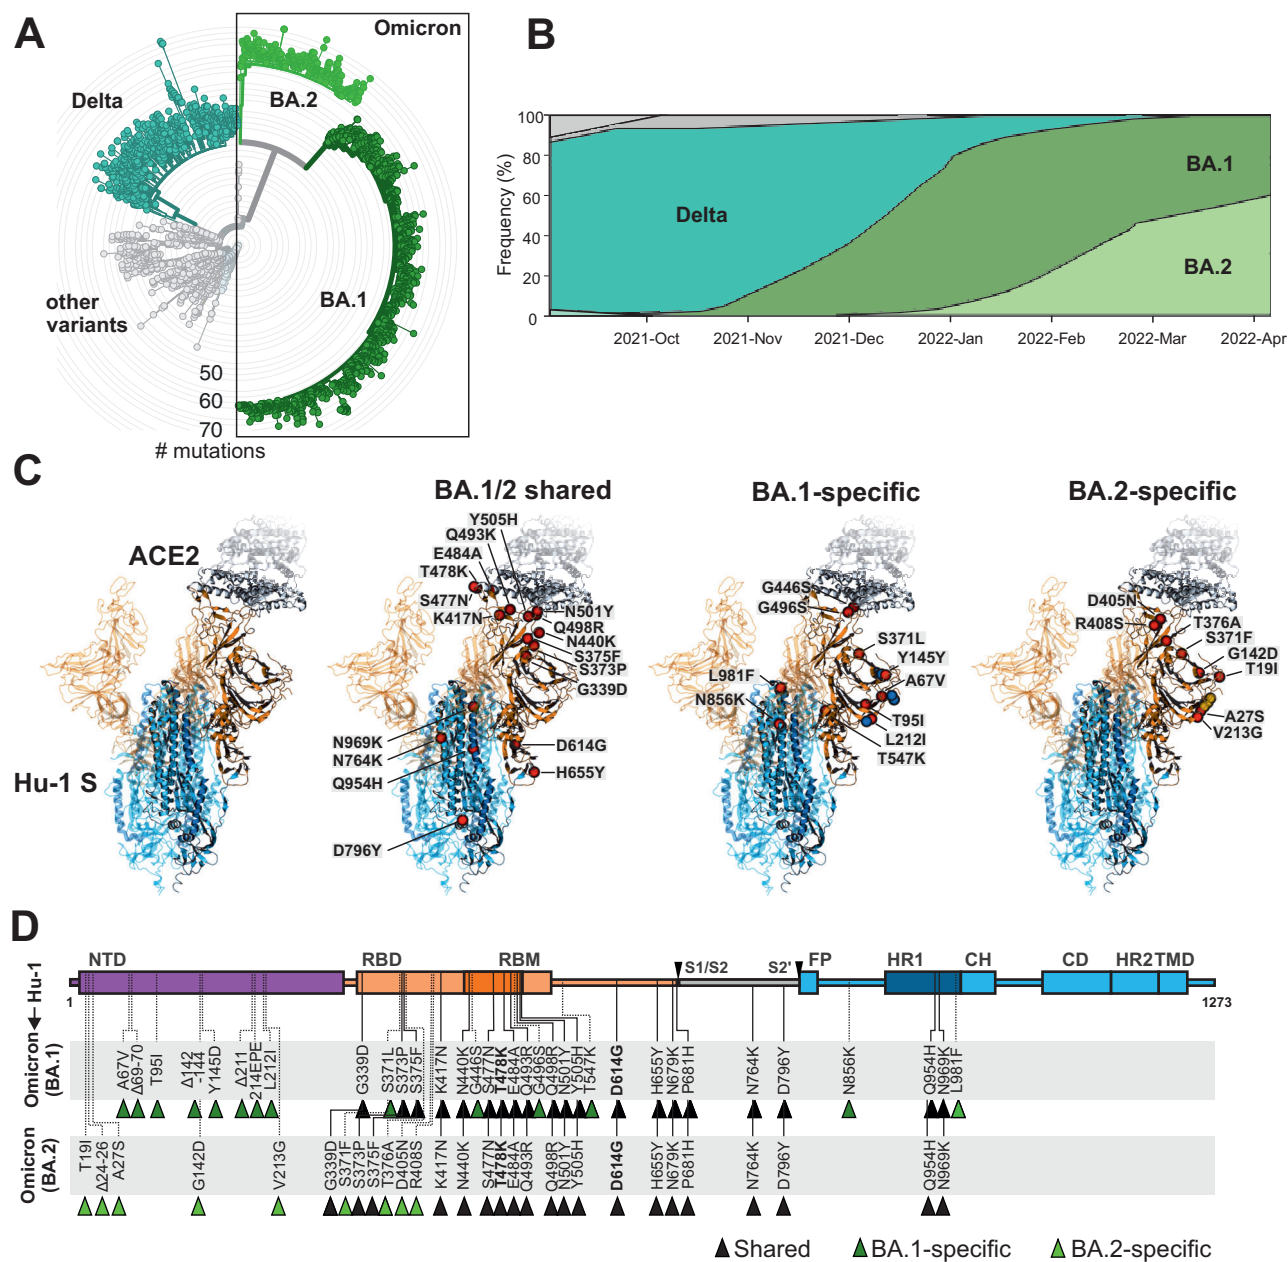

Fig. 2

Pastorio, Zech *et al.*

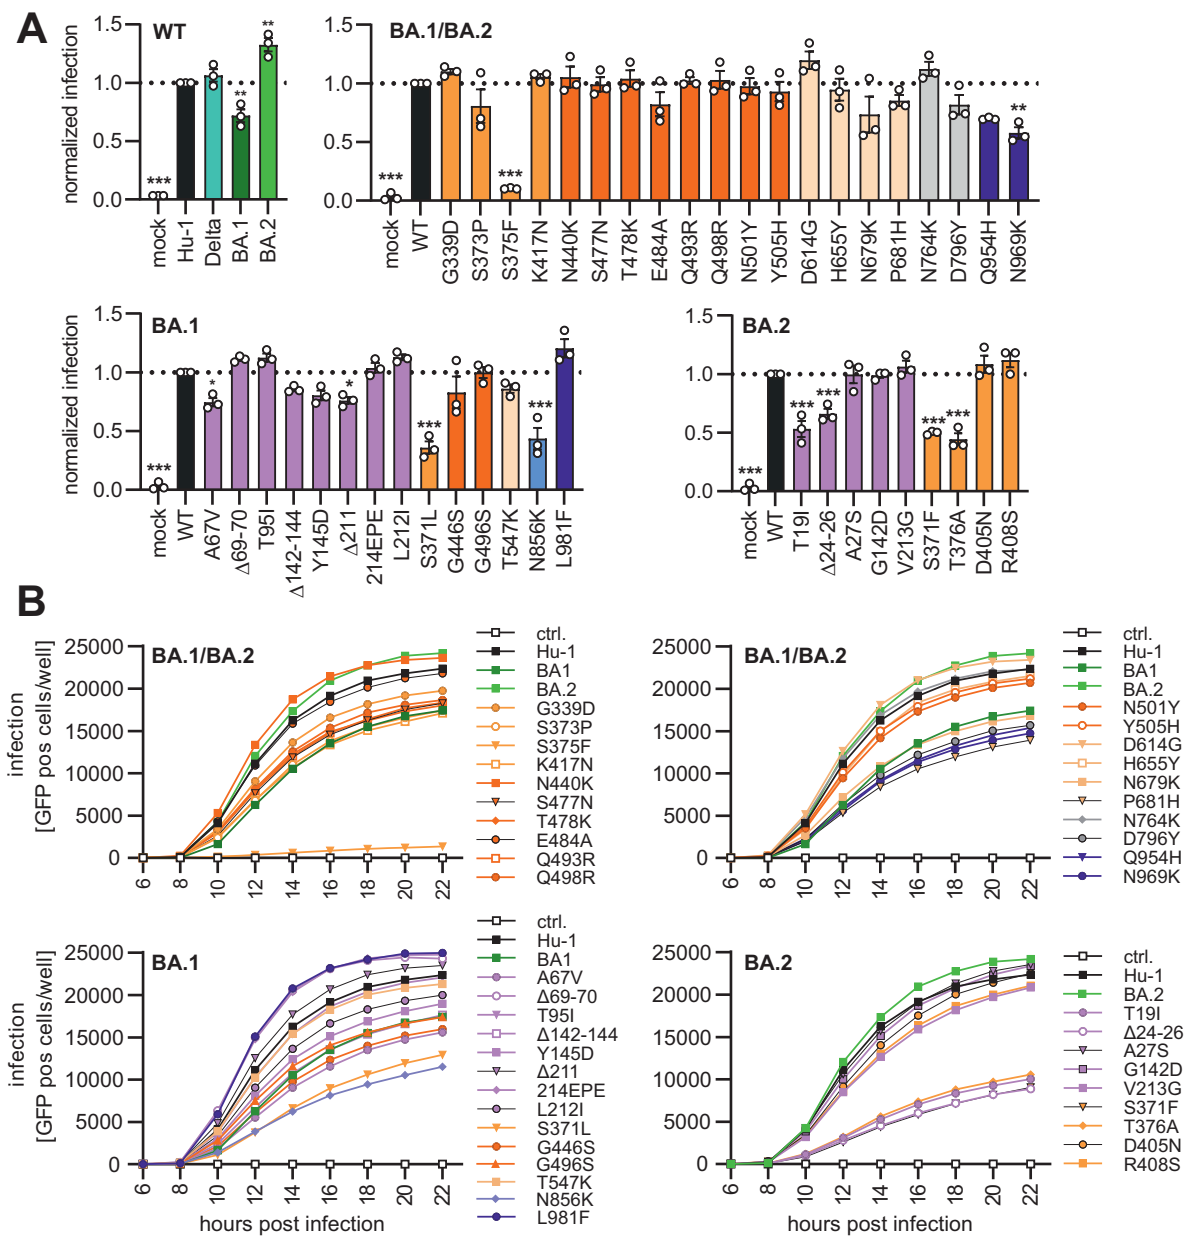

Fig. 3

Pastorio, Zech *et al.*

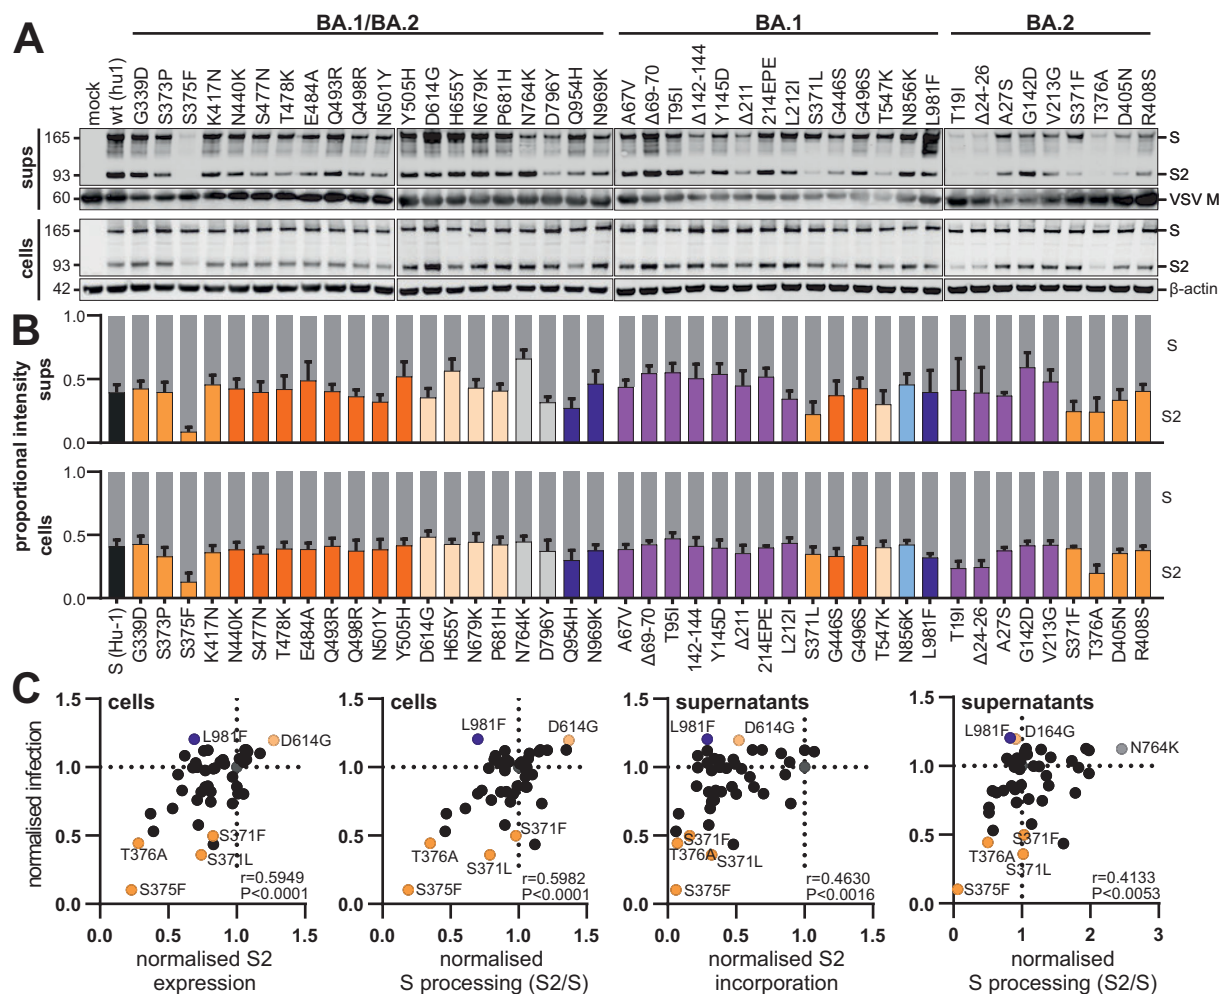



Fig. 4

Pastorio, Zech *et al.*

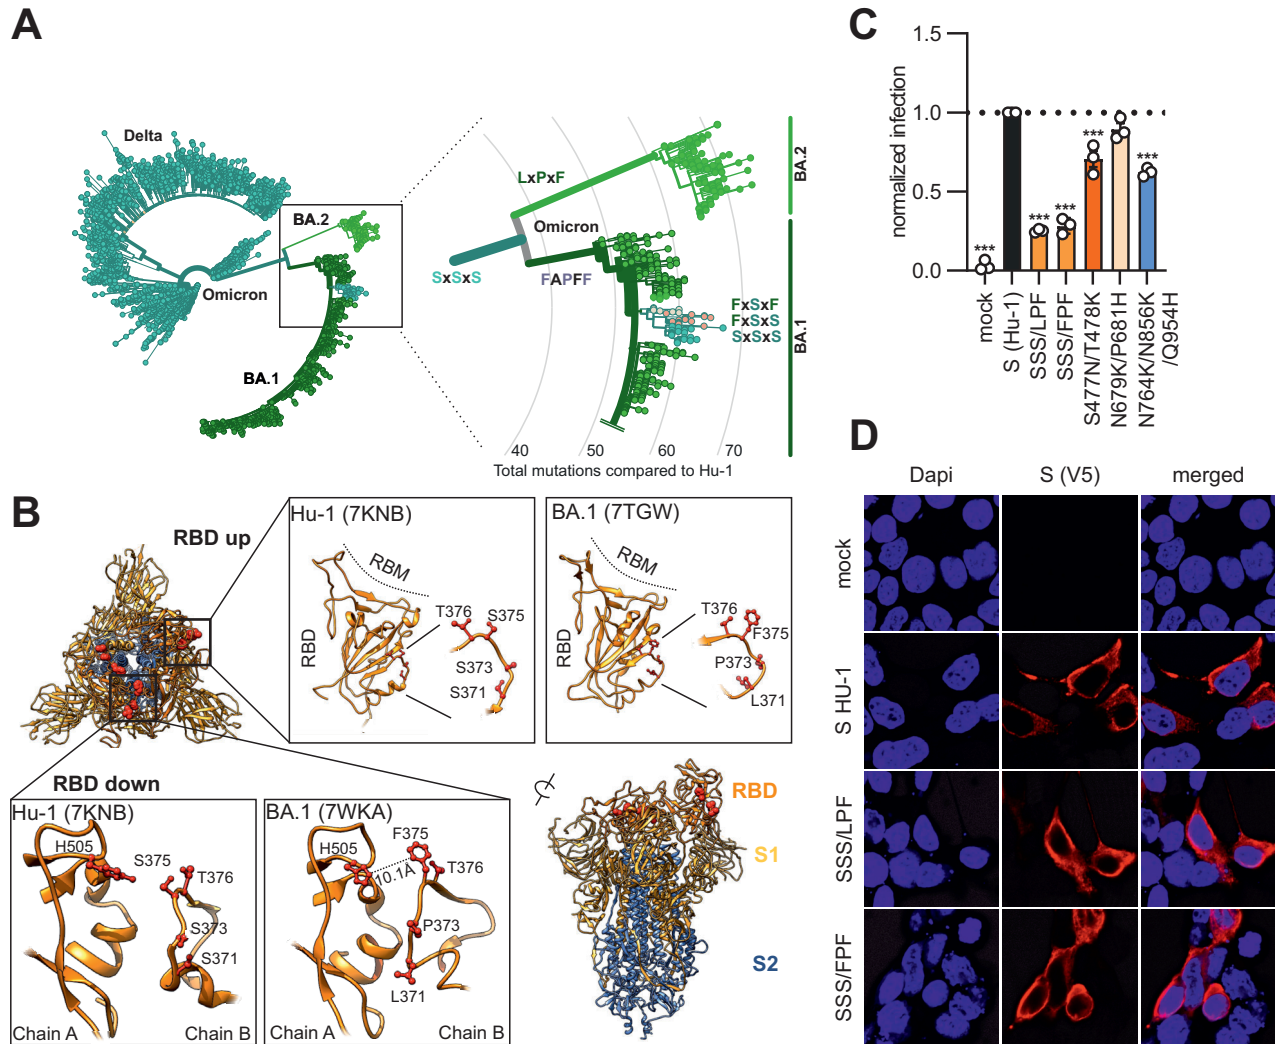

Fig. 5

Pastorio, Zech *et al.*

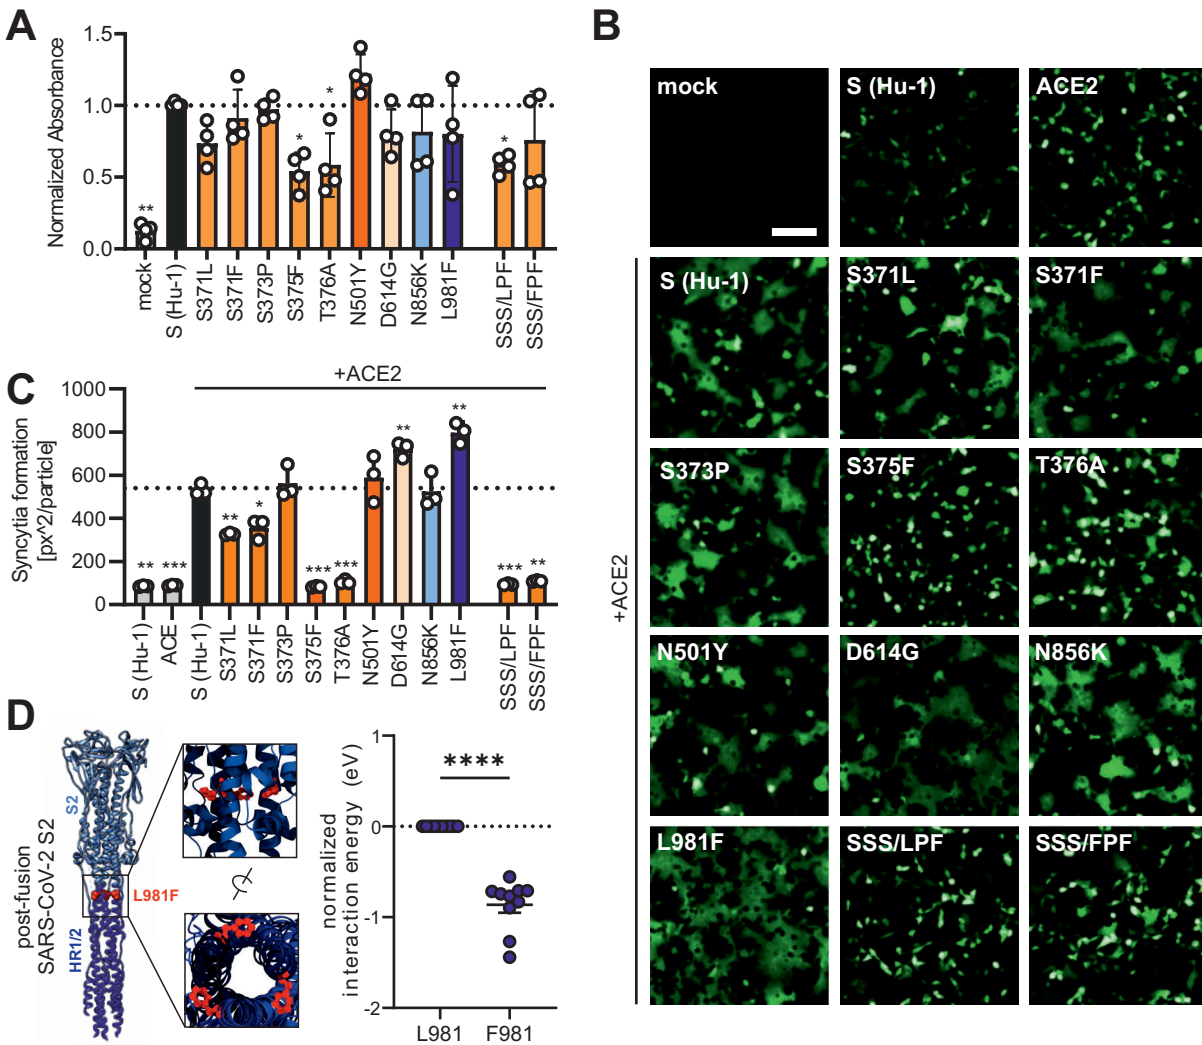



Fig. 6

Pastorio, Zech *et al.*

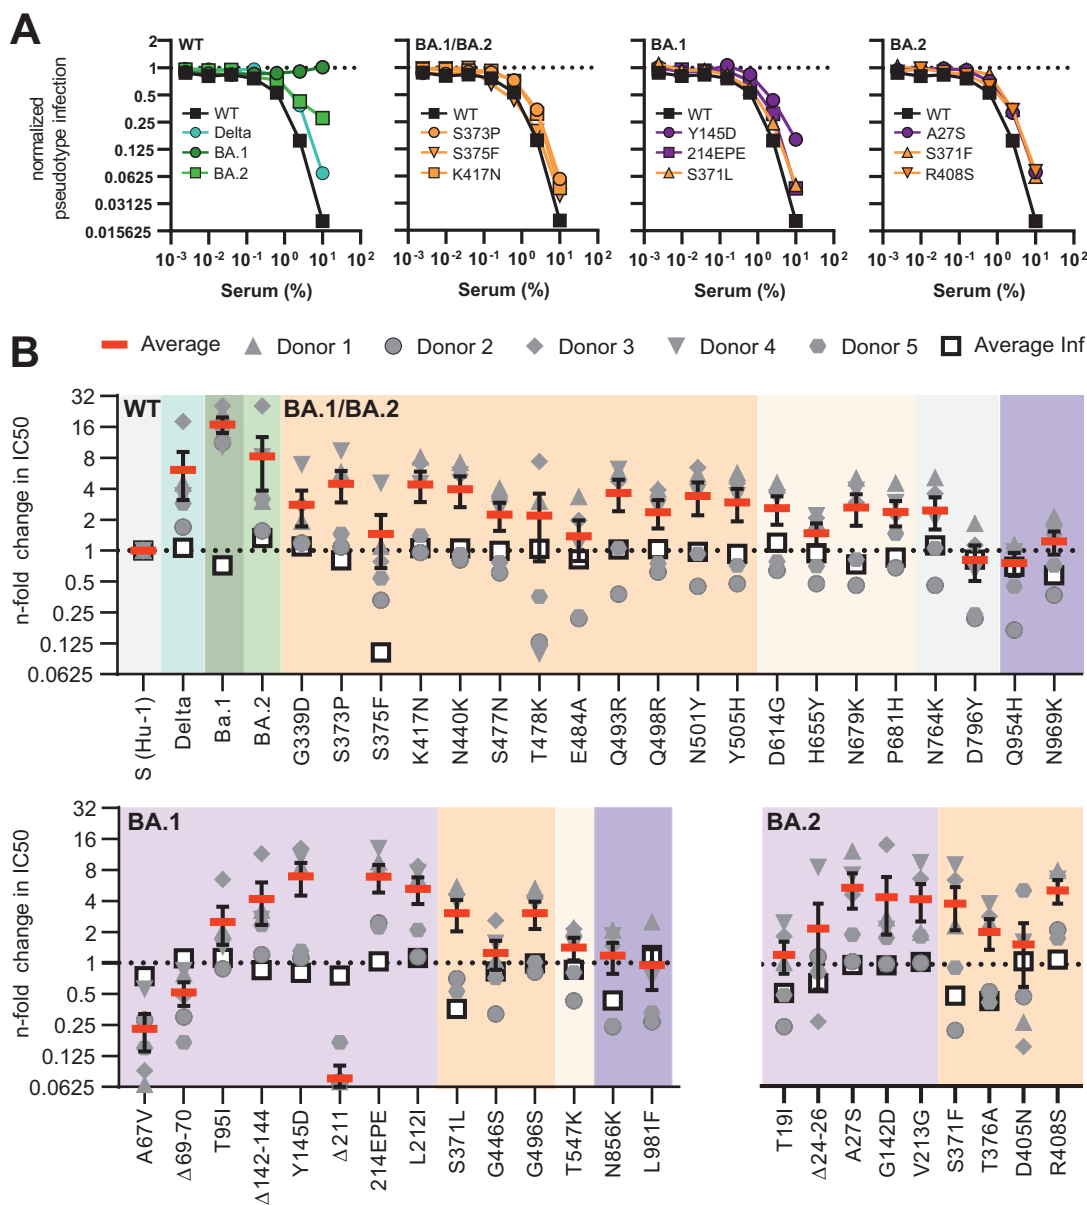

Fig. 7

Pastorio, Zech *et al.*

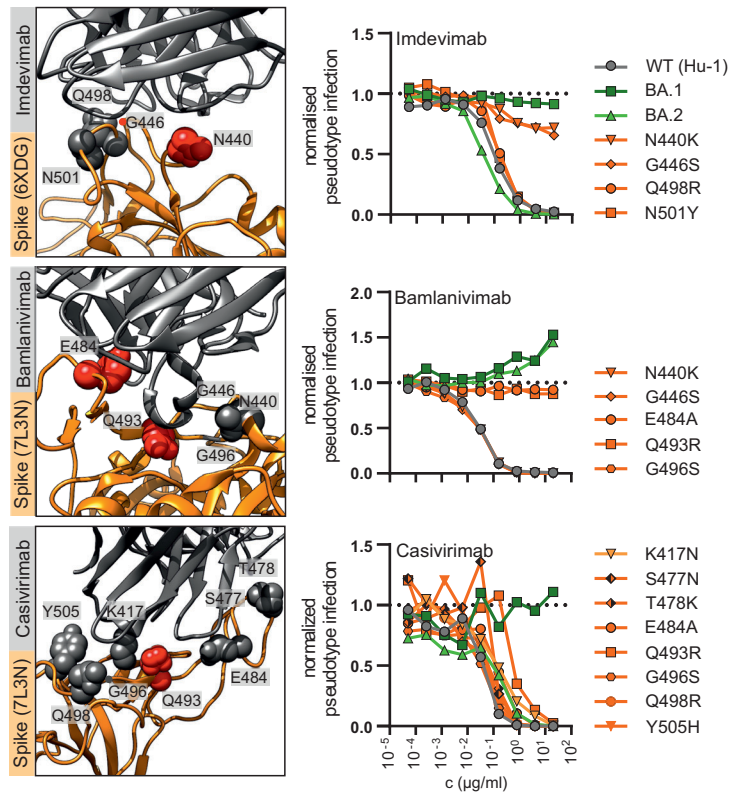

Source: https://www.biorxiv.org/content/10.1101/2022.04.13.488221v1.full.pdf
